# Supplementary material for: Dietary Perfluorohexanoic Acid (PFHxA) Exposures in Juvenile Zebrafish Produce Subtle Behavioral Effects across Generations
Source: MDPI journal article supplement (doi:10.3390/toxics10070372), 2022-07-04
Supplement: s1 [file s1]

## **Supplemental Information**

### **Contents:**

**Section S1.** Instrument Analysis by LC-MS/MS, and Extraction Method for Diet and Zebrafish Tissue.

**Section S2.** Target PFHxA, Acronym, Neutral Molecular Formula, and Surrogate Standard for Analysis by LC-MS/MS.

**Section S3.** Quantification and Quality Control.

**Section S4.** Accuracy (Recovery %), Precision (Relative Standard Deviation %), and Limits of Detection (LOD) and Quantification (LOQ) for PFHxA in the Diet and Zebrafish Tissue Matrices.

**Table S1.** Analytical Validation of PFHxA Concentration in Diet.

**Table S2.** Water Quality Standards.

**Table S3A.** Developmental Toxicity Assessment Morphological Endpoints.

**Table S3B.** Morphological Endpoints Additional Information.

**Table S4.** Associative Behavior Assay Results.

**Figure S1.** Adult Behavior Free Swim Assay– All Generations with Sex Plotted.

**Figure S2.** Adult Behavior Predator Response Assay for F0, F1, and F2, Separated by Sex.

**Figure S3.** Adult Behavior Startle Response for All Generations.

**Figure S4.** Adult Behavior Shoaling Assay for F1 and F2.

**Figure S5.** Adult Behavior Free Swim Assay for F1 and F2.

**Figure S6.** Adult Behavior Predator and Schooling Response for F1 and F2.

**Figure S7.** F2 Juvenile Behavior Assays.

**Data S1.** Predator Response Assay Statistical Analysis- F0.

**Data S2.** Predator Response Assay Statistical Analysis- F1.

**Data S3.** Predator Response Assay Statistical Analysis- F2.

**Data S4.** Schooling Response Assay Statistical Analysis- F0.

**Data S5.** Schooling Response Assay Statistical Analysis- F1.

**Data S6.** Schooling Response Assay Statistical Analysis- F2.

**Data S7.** Startle Response Assay Statistical Analysis- F0.

**Data S8.** Startle Response Assay Statistical Analysis- F1.

**Data S9.** Startle Response Assay Statistical Analysis- F2.

**Section S1.** Instrument Analysis by LC-MS/MS, and Extraction Method for Diet and Zebrafish Tissue.

An Agilent 1100 series high-performance liquid chromatography system (Santa Clara, CA) and Waters Acquity triple quadrupole mass spectrometer (Milford, MA) were employed for separation and quantification of PFHxA in stock solution, diet, and homogenized subadult zebrafish tissue (60 days post fertilization). A C18 delay column (4.6 x 50 mm x 5 µm Zorbax Eclipse) was fitted between the LC pump and the autosampler. Chromatographic separation was achieved by using a C18 guard column (4.6 mm x 12.5 mm x 5 µm; P.N 820950-925) and Eclipse C18 analytical column (4.6x 75mm x 3.5µm; P.N. 959933-902). Mobile phase A was composed of 3% volume methanol in deionized water with 20 mM ammonium acetate and mobile phase B was methanol. The initial flow rate was 0.6 ml/min and mobile phase B was kept at 1% for 2 min and then increased to 60%, 85% and 99% at 3, 8.5 and 9 min, respectively, followed by a hold at 99% mobile phase B until 12.7 min. MS parameters can be found in Rericha et al. (2021) [1].

The PFHxA stock solution used to contaminate the zebrafish diet was previously validated by Rericha et al. (2021) [1].

For extraction of the diet samples, approximately 0.5 g of each sample was measured into a 15 mL polypropylene centrifuge tube and spiked with 0.9 ng surrogate standard. Samples were vigorously vortexed and let sit for 30 min. 3 mL acetonitrile was added, vortexed, and sonicated for 10 min at room temperature, followed by additional vortexing and centrifugation for 5 min at 4472 x g. Liquid was decanted into a new 15 mL tube, and the addition of acetonitrile and subsequent steps were repeated. 30 µL ethylene glycol was added, samples were evaporated until only the ethylene glycol remained, and then reconstituted with 3 mL methanol. Samples were once again vigorously vortexed, centrifuged for 5 min, then liquid was decanted into a new 15 mL tube. 3 mL methanol was added to a tube with an ENVI-Carb column (250 mg bed mass used due to the complexity of the diet matrix; preconditioned with 12 mL methanol), then the centrifugation, decanting, and addition of 3 mL to ENVI-carb column were repeated. Liquid was decanted, evaporated, and reconstituted to 150 µL methanol.

For extraction of zebrafish tissue, samples were homogenized in 200 µL acetonitrile with 0.5 mm stainless steel beads using a Bullet Blender (Next Advance) for at least 6 minutes at speed 8

or until samples appeared completely homogenized. Homogenate was transferred into a 15 mL polypropylene centrifuge tube, rinsing the original container three times with 1 mL acetonitrile. The extraction procedure was the same as described for the diet above, but a 100 mg dispersive ENVI-Carb column was used for the cleanup step.

Analysis of sample extracts entailed aliquoting 50 µL extract, diluting with 40 µL methanol, 50 µL NaCl solution (1.2 g/30 mL), and 10 µL (0.3 ng) internal standard (M2PFOA and M8PFOS) for injection into instrument. An injection volume of 100 µL was utilized for all diet and zebrafish tissue extracts.

**Section S2.** Target PFHxA, Acronym, Neutral Molecular Formula, and Surrogate Standard for Analysis by LC-MS/MS.

| Chemical Name          | Acronym | Neutral Molecular Formula <sup>1</sup>                       | Surrogate Standard |
|------------------------|---------|--------------------------------------------------------------|--------------------|
| Perfluorohexanoic acid | PFHxA   | C <sub>6</sub> H <sub>0</sub> F <sub>11</sub> O <sub>2</sub> | M5PFHxA            |

**1[M-H]- adduct were used for quantification**

**Section S3.** Quantification and Quality Control.

Analytical-grade native and mass-labelled standards were purchased from Wellington labs (Guelph, Canada). The calibration curve for stock solutions ranged from 200 – 100,000 ng/L, and the two lowest points (200, 500 ng/L) of the calibration curve were used as quality control and required to be within 70%- 130%. Solvent blanks spiked with mass-labelled standard were used for checking the contamination and carryover. Concentrations of PFHxA were <LOD in all solvent blanks.

**Section S4.** Accuracy (recovery %), precision (relative standard deviation %), and limits of detection (LOD) and quantification (LOQ) for PFHxA in the diet and zebrafish tissue matrices.

LOD for PFHxA was calculated by using the method of Vial and Jardy (1999) [2], and LOQ LOD multiplied by 3.3.

| Matrix           | Accuracy % | Precision % | LOD       | LOQ       |
|------------------|------------|-------------|-----------|-----------|
| Diet             | 96         | 13          | 0.06 ng/g | 0.19 ng/g |
| Zebrafish tissue | 110        | 15          | 0.07 ng/g | 0.23 ng/g |

**Table S1.** Analytical Validation of PFHxA Concentration in Diet.

| Diet Granule Size | Nominal Concentration (ng/g) | Measured Concentration (ng/g) | Mean Measured Concentration (ng/g) |
|-------------------|------------------------------|-------------------------------|------------------------------------|
| 75-micron         | 0                            | 0.54                          | 0.50                               |
|                   |                              | 0.46                          |                                    |
|                   |                              | -                             |                                    |
|                   | 1                            | 1.2                           | 1.0                                |
|                   |                              | 1.2                           |                                    |
|                   |                              | 0.73                          |                                    |
|                   | 10                           | 5.5                           | 5.6                                |
|                   |                              | 6                             |                                    |
|                   |                              | 5.3                           |                                    |
|                   | 100                          | 390                           | 260                                |
|                   |                              | 190                           |                                    |
|                   |                              | 200                           |                                    |
| 150-micron        | 0                            | 0.0                           | 0.24                               |
|                   |                              | 0.4                           |                                    |
|                   |                              | 0.33                          |                                    |
|                   | 1                            | 1.0                           | 1.1                                |
|                   |                              | 1.6                           |                                    |
|                   |                              | 0.81                          |                                    |
|                   | 10                           | 5.4                           | 5.1                                |
|                   |                              | 4.7                           |                                    |
|                   |                              | 5.2                           |                                    |
|                   | 100                          | 300                           | 310                                |
|                   |                              | 280                           |                                    |
|                   |                              | 360                           |                                    |

**Table S2.** Water Quality Standards.

| Water Quality Parameter | Acceptable Range |
|-------------------------|------------------|
| Temperature             | 27-29 °C         |
| pH                      | 7-8              |
| Ammonia                 | ≤ 0.5 ppm        |
| Nitrate                 | ≤ 50 ppm         |
| Nitrite                 | ≤ 1 ppm          |

**Table S3A.** Developmental Toxicity Assessment Morphological Endpoints. Description of morphological endpoints and the timepoints at which they are assessed. See Table S3B for additional information on endpoint derivation and identification.

| <b>Endpoint</b>   | <b>Definition</b>                                                                                                 |
|-------------------|-------------------------------------------------------------------------------------------------------------------|
| <b>MO24</b>       | Mortality observed at 24 hpf                                                                                      |
| <b>DP24</b>       | Delayed developmental by 24 hpf                                                                                   |
| <b>SM24</b>       | Spontaneous movement at 24 hpf                                                                                    |
| <b>MORT</b>       | Mortality occurring between 24 and 120 hpf                                                                        |
| <b>CRAN</b>       | Malformed, missing or smaller than normal eye, snout, and/or jaw at 120 hpf                                       |
| <b>AXIS</b>       | Curved or bent axis in either direction at 120 hpf                                                                |
| <b>EDEM</b>       | Heart and/or yolk sac malformation, pericardial or yolk sac edema (fluid around the heart) at 120 hpf             |
| <b>MUSC</b>       | Lack of circulation, malformation or disorganized/missing somites, and improper swim bladder formation at 120 hpf |
| <b>LTRK</b>       | Malformation of the lower trunk, including caudal fin region at 120 hpf                                           |
| <b>BRN_</b>       | Brain malformations or necrosis at 120 hpf                                                                        |
| <b>SKIN</b>       | Abnormal pigmentation at 120 hpf                                                                                  |
| <b>NC__</b>       | Notochord malformation at 120 hpf                                                                                 |
| <b>TCHR</b>       | Not responsive to touch at 120 hpf                                                                                |
| <b>ANY.effect</b> | Combined incidence of any of the above-described morphological effects                                            |

**Table S3B.** Morphological Endpoints Additional Information. Original endpoints, as described with representative images on GitHub ([https://github.com/Tanguay-Lab/Bioinformatic\\_and\\_Toxicological\\_Resources/tree/main/Files/Zebrafish\\_Phenotype\\_Atlas](https://github.com/Tanguay-Lab/Bioinformatic_and_Toxicological_Resources/tree/main/Files/Zebrafish_Phenotype_Atlas)) have been collapsed into the current endpoints based on their correlated nature and frequency of co-occurrence. Current endpoints were assessed and reported for the present study.

| Current Endpoints | Abbreviation | Original Endpoints |       |        |
|-------------------|--------------|--------------------|-------|--------|
|                   |              |                    |       |        |
| MO24              | MO24         |                    |       |        |
| DP24              | DP24         |                    |       |        |
| SM24              | SM24         |                    |       |        |
| Mortality         | MORT         | MORT               |       |        |
| Axis              | AXIS         | AXIS               |       |        |
| Brain             | BRN_         | BRAIN              | OTIC  | PFIN   |
| Craniofacial      | CRAN         | EYE                | SNOUT | JAW    |
| Edema             | EDEM         | YSE                | PE    |        |
| Lower Trunk       | LTRK         | TRUNK              | CFIN  |        |
| Muscles           | MUSC         | CIRC               | SWIM  | SOMITE |
| Skin              | SKIN         | PIG                |       |        |
| Touch Response    | TCHR         | TR                 |       |        |
| Notochord         | NC__         | NC                 |       |        |

**Table S4.** Associative Behavior Assay Results.

| Generation | Nominal Concentration PFHxA Added to Diet (ng/g) | Outcome     | Female | Male | Percent | Average Critical Trial Number |
|------------|--------------------------------------------------|-------------|--------|------|---------|-------------------------------|
| F0         | 0                                                | Not learner | 10     | 3    | 21      | -                             |
|            |                                                  | Learner     | 22     | 27   | 79      | 3.78                          |
|            | 1                                                | Not learner | 5      | 3    | 13      | -                             |
|            |                                                  | Learner     | 25     | 29   | 87      | 5.24                          |
|            | 10                                               | Not learner | 7      | 2    | 15      | -                             |
|            |                                                  | Learner     | 23     | 30   | 85      | 5.42                          |
|            | 100                                              | Not learner | 4      | 5    | 14      | -                             |
|            |                                                  | Learner     | 27     | 27   | 86      | 4.94                          |
| F1         | 0                                                | Not learner | 5      | 4    | 14      | -                             |
|            |                                                  | Learner     | 27     | 27   | 86      | 6.94                          |
|            | 1                                                | Not learner | 6      | 4    | 15      | -                             |
|            |                                                  | Learner     | 26     | 29   | 85      | 5.73                          |
|            | 10                                               | Not learner | 5      | 4    | 14      | -                             |
|            |                                                  | Learner     | 26     | 28   | 86      | 7.96                          |
|            | 100                                              | Not learner | 5      | 2    | 11      | -                             |
|            |                                                  | Learner     | 27     | 30   | 89      | 6.04                          |
| F2         | 0                                                | Not learner | 13     | 11   | 36      | -                             |
|            |                                                  | Learner     | 20     | 22   | 64      | 7.26                          |
|            | 1                                                | Not learner | 10     | 8    | 29      | -                             |
|            |                                                  | Learner     | 21     | 23   | 71      | 7.36                          |
|            | 10                                               | Not learner | 11     | 16   | 42      | -                             |
|            |                                                  | Learner     | 21     | 16   | 58      | 8.95                          |
|            | 100                                              | Not learner | 8      | 8    | 25      | -                             |
|            |                                                  | Learner     | 24     | 24   | 75      | 7.23                          |

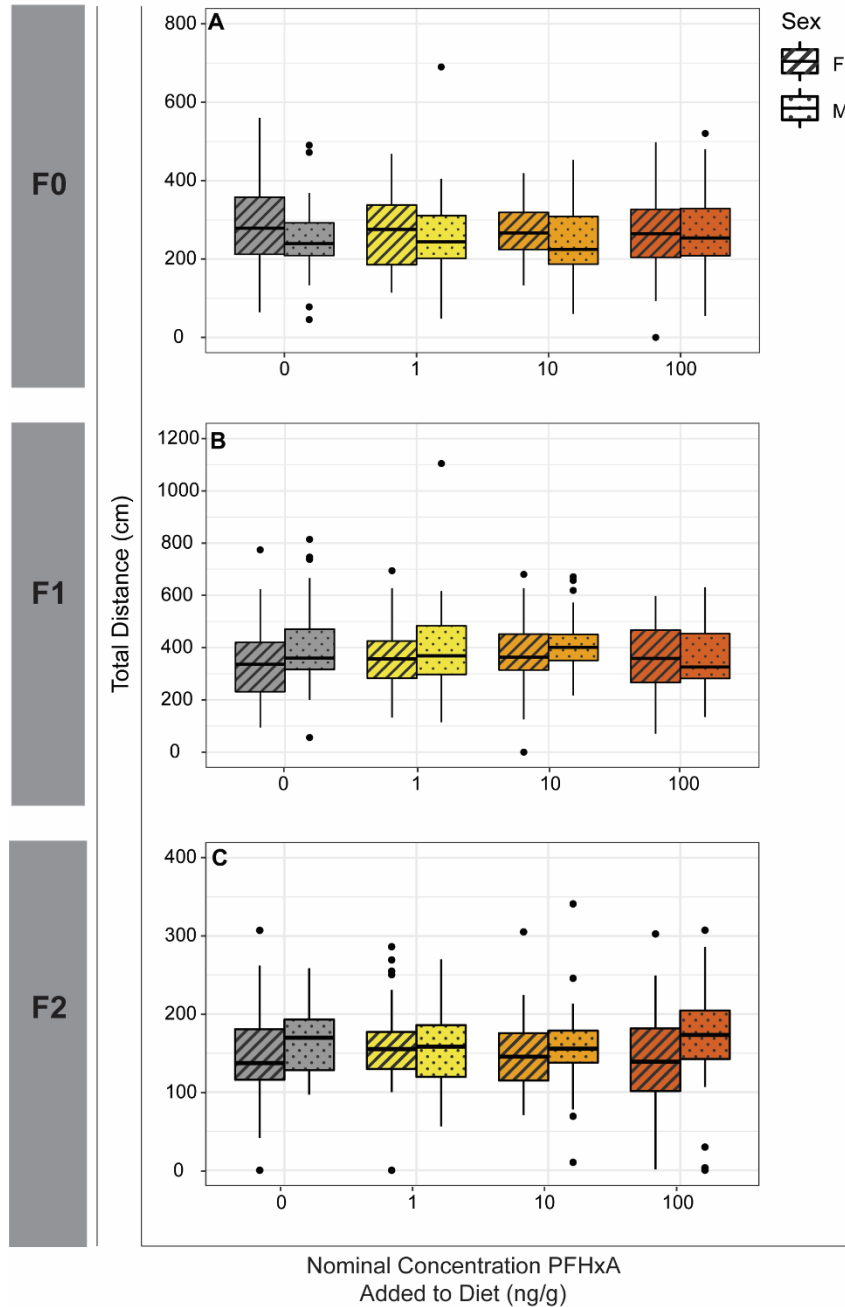

**Figure S1.** Adult Behavior Free Swim Assay– All Generations with Sex Plotted. Results from the Free Swim assay ( $n = 63-68$ , 32-35 males and 31-34 females) for all generations. Exposure groups are indicated on the x-axis and by color (grey: 0 ng/g, yellow: 1 ng/g, orange: 10 ng/g, and red: 100 ng/g PFHxA added to the F0 diet). Females are indicated by striped boxes, while males are indicated by dotted boxes. Within each generation, no significant difference in total distances between the sexes or the exposure groups was noted for the F0 (A), F1 (B), or the F2 (C;  $p > 0.05$ ).



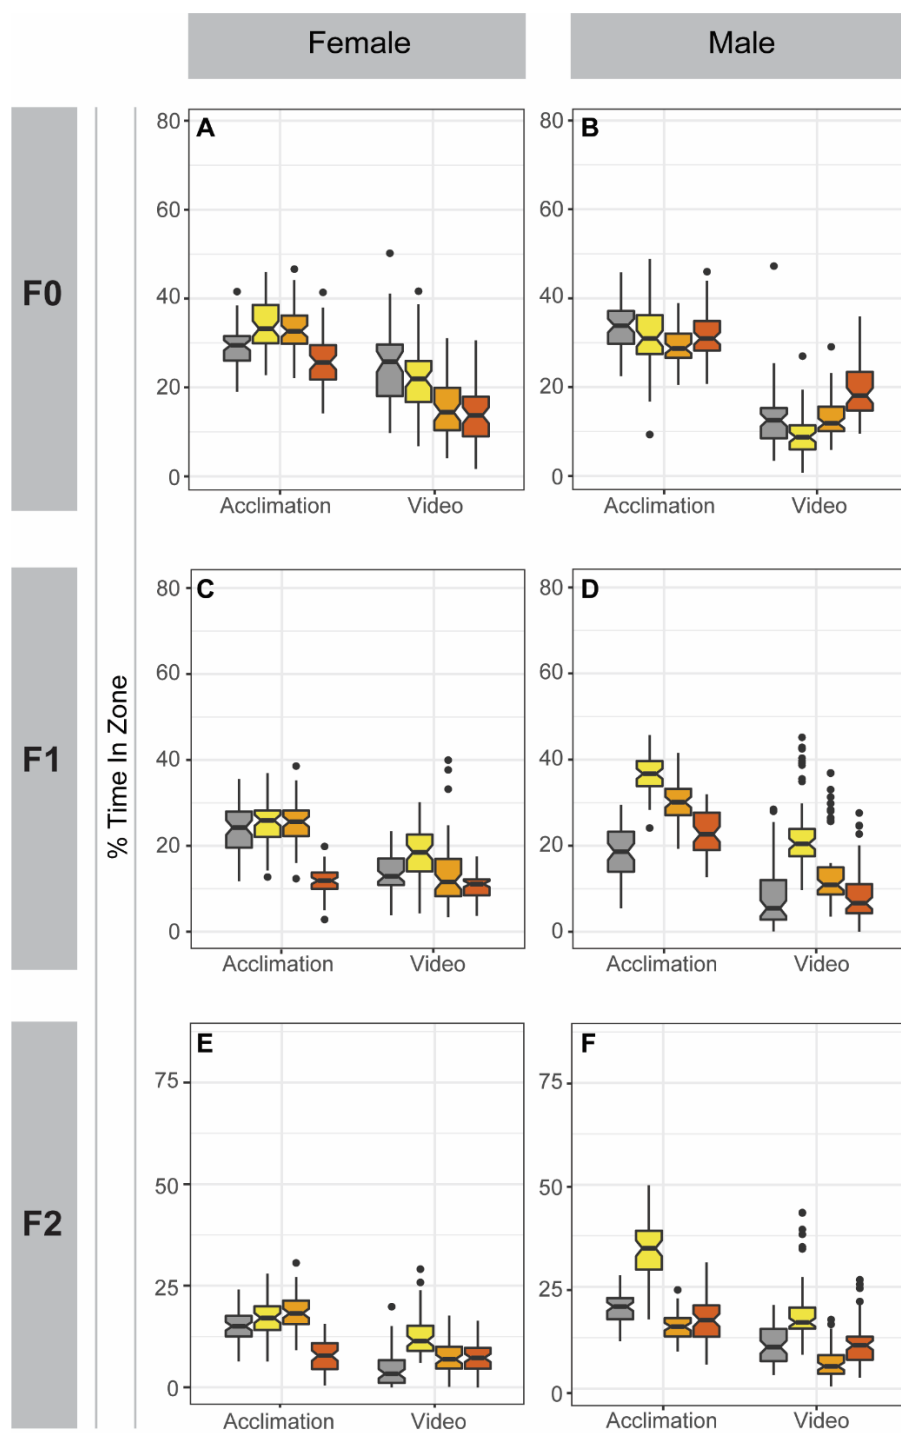

**Figure S2.** Adult Behavior Predator Response Assay for F0, F1, and F2, Separated by Sex. Plots show percent time (cumulative duration) spent in the near zone, closest to the video display before a predator video was displayed (Acclimation) and after (Video) for females (**A, C, E**) and males (**B, D, F**) from the F0, F1, and F2 generations (n = 56-68, 28-34 males and 27-34 females). Within each clustered set of boxplots, exposure groups are as follows left to right: Control (grey), 1 ng/g (yellow), 10 ng/g (orange), and 100 ng/g (red) PFHxA added to the F0 diet.

Significant differences determined by three-way ANOVA are not shown on plots but can be found in the supplementary Data S1-S3.

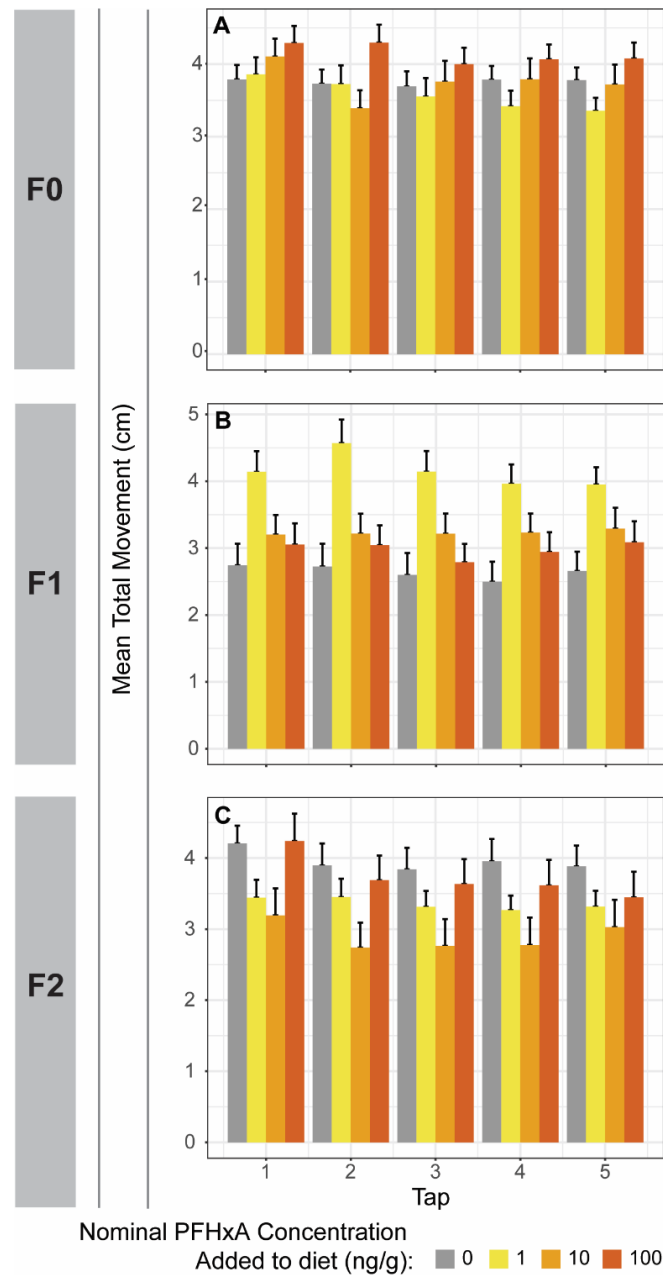

**Figure S3.** Adult Behavior Startle Response for All Generations. Exposure groups are indicated in the legend by color and within each cluster of bars (from left to right, grey: 0 ng/g, yellow: 1 ng/g, orange: 10 ng/g, and red: 100 ng/g PFHxA added to the diet). Startle response ( $n = 58-68$ , 29-35 males and 28-34 females) in average total movement (cm) was evaluated across a series of consecutive solenoid taps, indicated on the x-axis. In the F0 generation (A), the 100 ng/g group exhibited hyperactive startle response relative to controls ( $p = 0.035$ ). For the F1 generation (B),

the 1 and 10 ng/g groups were hyperactive relative to controls ( $p < 0.005$ ,  $p = 0.010$ , respectively). In the F2 generation (C), the 1 and 10 ng/g groups exhibited hypoactive startle response relative to controls ( $p = 0.014$ ,  $p < 0.005$ , respectively). For the F1 and F2 generations, sex was a significant factor, and statistical analysis by repeated measure ANOVA can be found in the supplementary Data S7-S9.

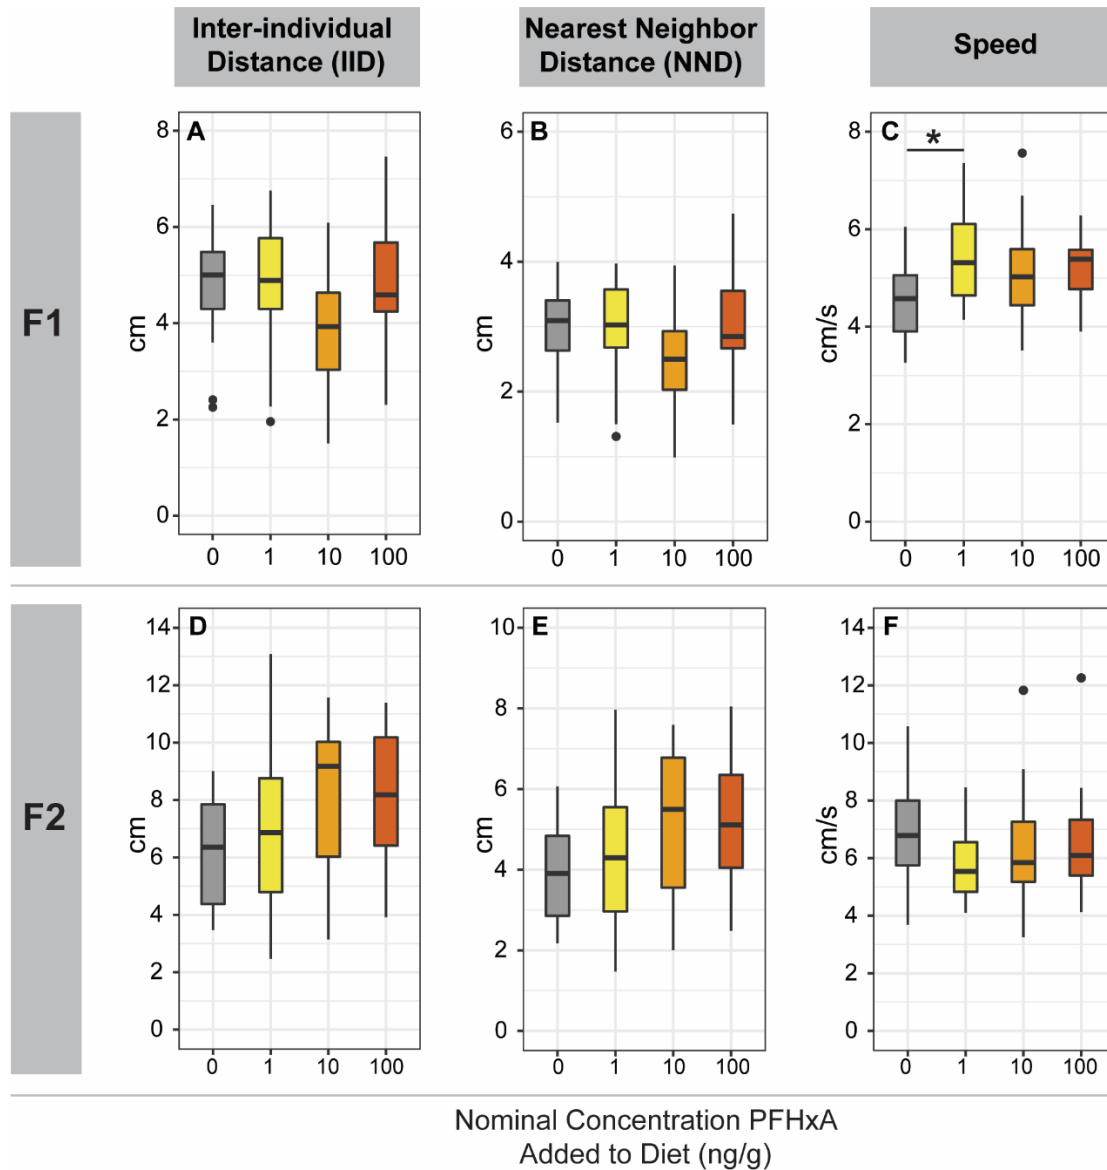

**Figure S4.** Adult Behavior Shoaling Assay for F1 and F2. Exposure groups are indicated on the x-axes and also by color (grey: 0 ng/g, yellow: 1 ng/g, orange: 10 ng/g, and red: 100 ng/g PFHxA added to the F0 diet). Assessing the behavior of 16 groups of 4 zebrafish, no significant exposure effects were observed for the F1 inter-individual distance (A) or nearest neighbor distance (B), but the 1 ng/g exposure group exhibited a higher speed than controls (C;  $p = 0.024$ ). No significant effects were observed for the F2 generation (D-F) for any endpoints ( $p > 0.05$ ).

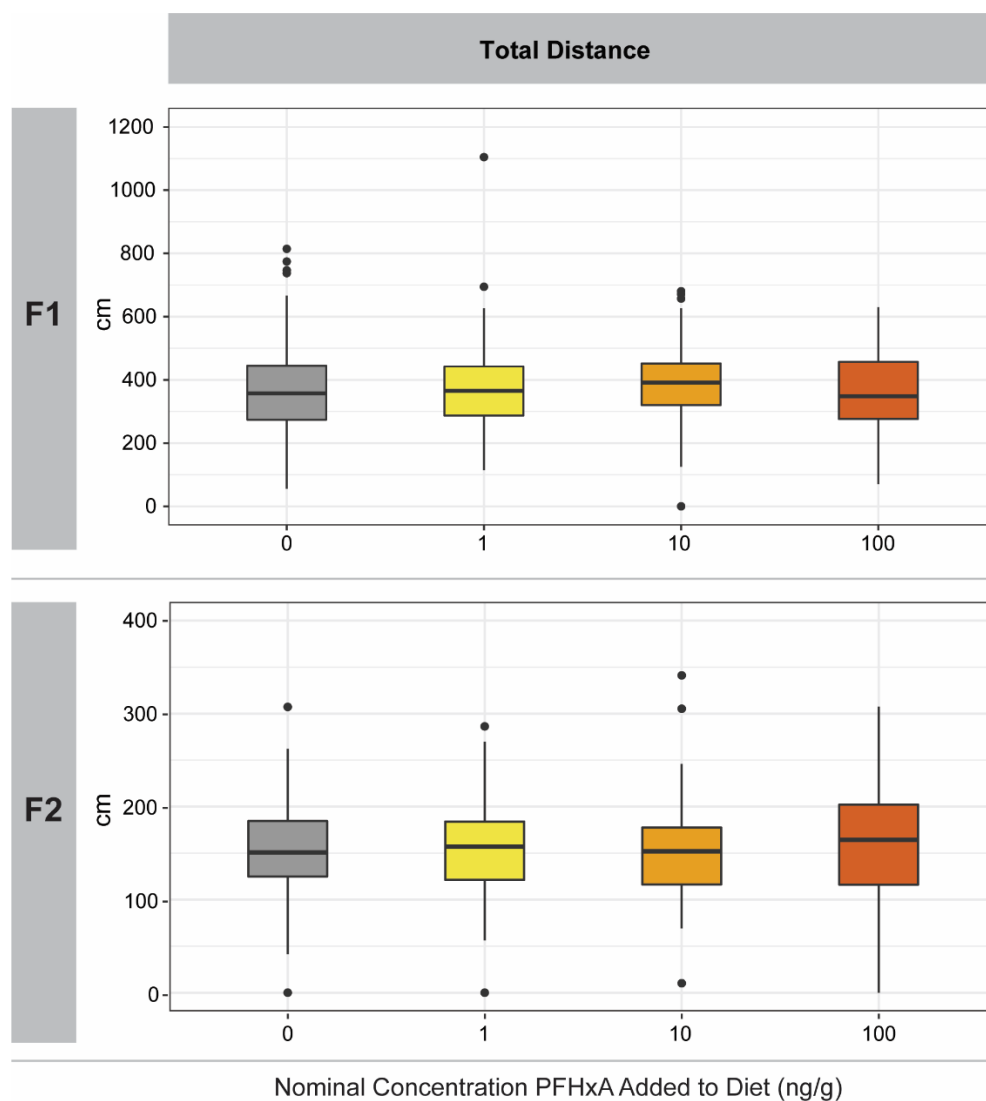

**Figure S5.** Adult Behavior Free Swim Assay for F1 and F2. Exposure groups are indicated on the x-axes and also by color (grey: 0 ng/g, yellow: 1 ng/g, orange: 10 ng/g, and red: 100 ng/g PFHxA added to the F0 diet). No significant exposure effects on average total distance swam ( $n = 63-68$ ) were observed for the F1 (top) or the F2 (bottom) generation ( $p > 0.05$ ).

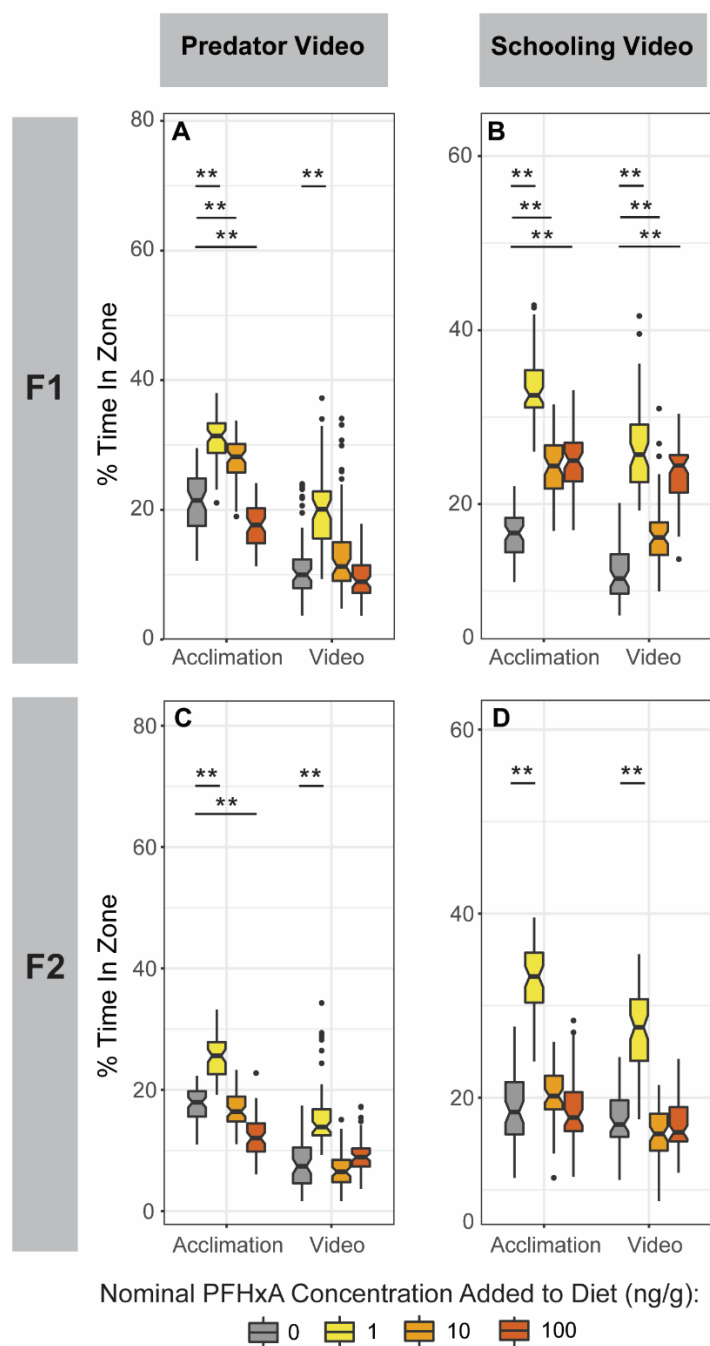

**Figure S6.** Adult Behavior Predator and Schooling Response for F1 and F2. Plots show percent time (cumulative duration) spent in the near zone, closest to the video display that showed a predator video (A,C) and a zebrafish schooling video (B,D). Exposure groups are indicated by color (grey: 0, yellow: 1, orange: 10, and red: 100 ng/g PFHxA added to the F0 diet). For both videos for the F1 (A,B) and F2 (C,D) generations (n = 56-64), the time spent in the near zone was significantly decreased for all exposure groups after the video was displayed (Video) compared to before the video was displayed (Acclimation) ( $p < 0.005$ ), except for the F1 and F2 100 ng/g exposure groups and F2 controls in the schooling response. Significant differences between

groups within the Acclimation and Video periods are indicated on the plots (\* $p < 0.05$ ; \*\* $p < 0.005$ ).

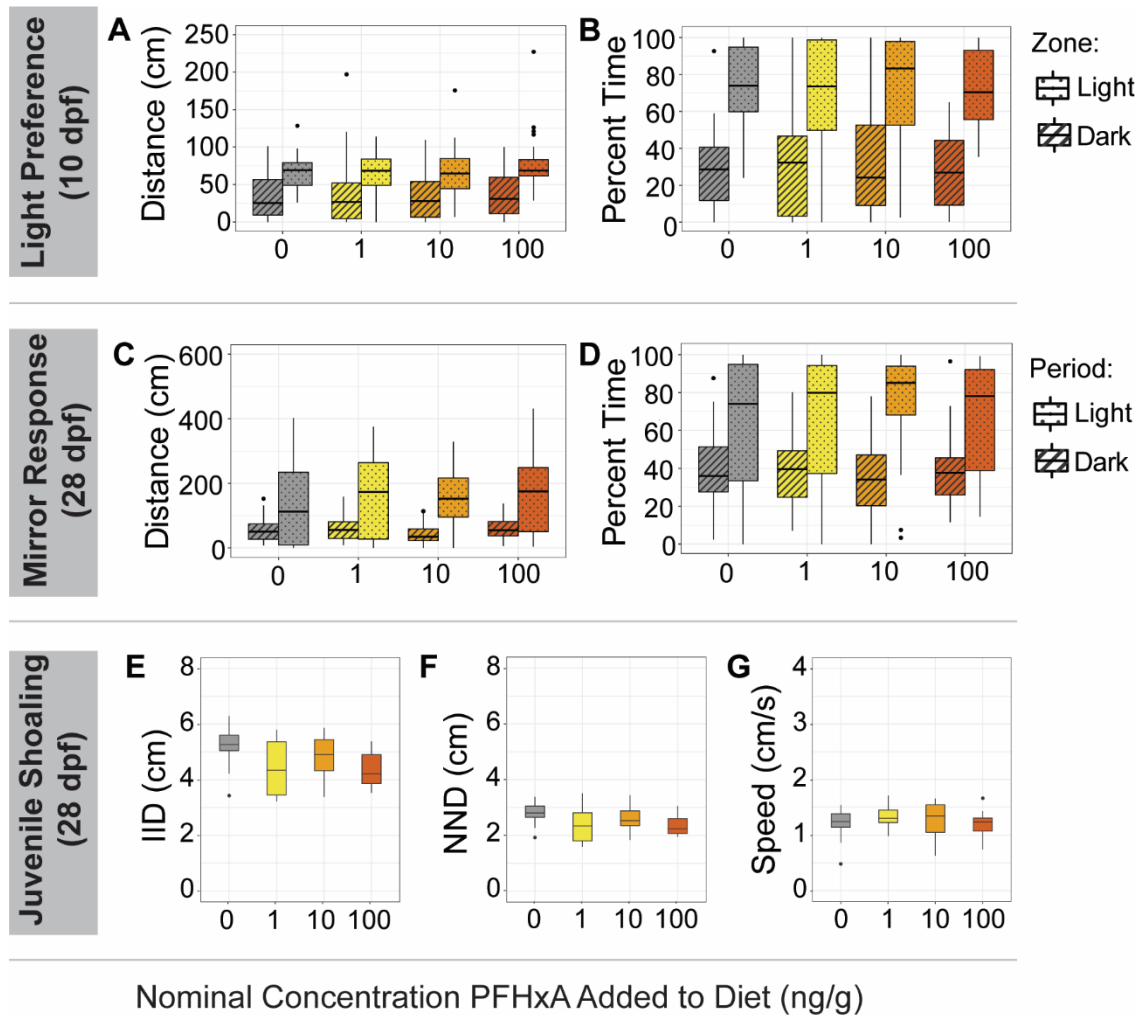

**Figure S7.** F2 Juvenile Behavior Assays. Results for the F2 generation challenged with juvenile behavior assays. Exposure groups (nominal concentration of PFHxA added to the diet fed to the F0 generation) are indicated on the x-axes and designated by color (grey: 0 ng/g, yellow: 1 ng/g, orange: 10 ng/g, and red: 100 ng/g PFHxA). There were no significant differences between exposure groups in the distance swam (**A**) or percent time spent (**B**) in the light (dotted boxes) or dark (striped boxes) zones in the 10 dpf light/dark preference assay. Distance swam (**C**) or percent time spent (**D**) in the mirror zone in the 28 dpf mirror response assay were also unaffected. Similarly, no significant differences were observed for inter-individual distance (IID; **E**), nearest neighbor distance (NND; **F**) or speed (**G**;  $p > 0.05$ ).

**Data S1.** Predator Response Assay Statistical Analysis- F0.

|                      | Df    | Sum Sq   | Mean Sq | F value  | Pr(>F)   |     |
|----------------------|-------|----------|---------|----------|----------|-----|
| Treatment            | 3     | 41019    | 13673   | 9.745    | 2.01E-06 | *** |
| status               | 1     | 1679530  | 1679530 | 1197.088 | < 2e-16  | *** |
| Sex                  | 1     | 43846    | 43846   | 31.251   | 2.29E-08 | *** |
| Treatment:status     | 3     | 49970    | 16657   | 11.872   | 9.11E-08 | *** |
| Treatment:Sex        | 3     | 195384   | 65128   | 46.42    | < 2e-16  | *** |
| status:Sex           | 1     | 77533    | 77533   | 55.262   | 1.08E-13 | *** |
| Treatment:status:Sex | 3     | 115900   | 38633   | 27.536   | < 2e-16  | *** |
| Residuals            | 31780 | 44587761 | 1403    |          |          |     |

---

Signif. codes: 0 '\*\*\*' 0.001 '\*\*' 0.01 '\*' 0.05 '.' 0.1 ' ' 1

Tukey's multiple comparisons of means

95% family-wise confidence level

Fit: aov(formula = duration ~ Treatment \* status \* Sex, data)

\$Treatment

|                  | diff      | lwr         | upr        | p adj     |
|------------------|-----------|-------------|------------|-----------|
| 100 ng/g-Control | -2.540428 | -4.05263648 | -1.03E+00  | 0.0000937 |
| 1 ng/g-Control   | -1.077934 | -2.60E+00   | 0.4459992  | 0.265128  |
| 10 ng/g-Control  | -2.782154 | -4.31E+00   | -1.2583211 | 0.0000162 |

\$status

|                   | diff      | lwr       | upr       | p adj |
|-------------------|-----------|-----------|-----------|-------|
| Video-Acclimation | -14.53779 | -15.36133 | -13.71425 | 0     |

\$Sex

|     | diff      | lwr       | upr       | p adj |
|-----|-----------|-----------|-----------|-------|
| M-F | -2.347051 | -3.170526 | -1.523576 | 0     |

\$`Treatment:status`

|                                          | diff       | lwr        | upr         | p adj     |
|------------------------------------------|------------|------------|-------------|-----------|
| 100 ng/g:Acclimation-Control:Acclimation | -2.779354  | -5.3237    | -0.2350086  | 0.0209213 |
| 1 ng/g:Acclimation-Control:Acclimation   | 1.470473   | -1.093692  | 4.0346386   | 0.6620879 |
| 10 ng/g:Acclimation-Control:Acclimation  | -0.489729  | -3.053552  | 2.0740944   | 0.9991189 |
| Control:Video-Control:Acclimation        | -12.323384 | -14.837414 | -9.8093543  | 0         |
| 100 ng/g:Video-100 ng/g:Acclimation      | -11.850431 | -14.383165 | -9.3176963  | 0         |
| 1 ng/g:Video-1 ng/g:Acclimation          | -17.330738 | -19.902318 | -14.7591586 | 0         |
| 10 ng/g:Video-10 ng/g:Acclimation        | -16.831612 | -19.402851 | -14.2603735 | 0         |
| 100 ng/g:Video-Control:Video             | -2.306401  | -4.808679  | 0.1958768   | 0.096492  |
| 1 ng/g:Video-Control:Video               | -3.536881  | -6.058473  | -1.0152894  | 0.0005619 |

| 10 ng/g:Video-Control:Video                   | -4.997957   | -7.519549   | -2.4763656   | 0.0000001 |
|-----------------------------------------------|-------------|-------------|--------------|-----------|
| \$`Treatment:Sex`                             |             |             |              |           |
|                                               | diff        | lwr         | upr          | p adj     |
| 100 ng/g:F-Control:F                          | -7.349567   | -9.8630985  | -4.83603552  | 0         |
| 1 ng/g:F-Control:F                            | 0.7810541   | -1.75161    | 3.31371823   | 0.9827226 |
| 10 ng/g:F-Control:F                           | -3.1516723  | -5.7476365  | -0.55570813  | 0.0057206 |
| Control:M-Control:F                           | -4.1033289  | -6.6170145  | -1.58964334  | 0.0000207 |
| 100 ng/g:M-100 ng/g:F                         | 5.5997366   | 3.0670725   | 8.13240074   | 0         |
| 1 ng/g:M-1 ng/g:F                             | -7.943034   | -10.5145499 | -5.37151799  | 0         |
| 10 ng/g:M-10 ng/g:F                           | -3.1235193  | -5.7020412  | -0.54499744  | 0.0058983 |
| 100 ng/g:M-Control:M                          | 2.3534985   | -0.1793185  | 4.88631549   | 0.0909174 |
| 1 ng/g:M-Control:M                            | -3.058651   | -5.6114772  | -0.5058247   | 0.0068414 |
| 10 ng/g:M-Control:M                           | -2.1718627  | -4.667531   | 0.32380554   | 0.1424881 |
| \$`status:Sex`                                |             |             |              |           |
|                                               | diff        | lwr         | upr          | p adj     |
| Video:F-Acclimation:F                         | -11.3811533 | -12.9164019 | -9.845905    | 0         |
| Acclimation:M-Acclimation:F                   | 0.8266358   | -0.7127611  | 2.366033     | 0.5122131 |
| Video:M-Video:F                               | -5.4163463  | -6.9301985  | -3.902494    | 0         |
| Video:M-Acclimation:M                         | -17.6241354 | -19.1421945 | -16.106076   | 0         |
| \$`Treatment:status:Sex`                      |             |             |              |           |
|                                               | diff        | lwr         | upr          | p adj     |
| 100 ng/g:Acclimation:F-Control:Acclimation:F  | -3.4377667  | -7.4898001  | 0.61426683   | 0.2114188 |
| 1 ng/g:Acclimation:F-Control:Acclimation:F    | 5.0863486   | 1.003201    | 9.16949619   | 0.0021031 |
| 10 ng/g:Acclimation:F-Control:Acclimation:F   | 4.0422841   | -0.1426381  | 8.22720631   | 0.0717893 |
| Control:Video:F-Control:Acclimation:F         | -3.9685643  | -7.9872472  | 0.05011852   | 0.0572125 |
| Control:Acclimation:M-Control:Acclimation:F   | 4.3909307   | 0.3388972   | 8.44296414   | 0.018912  |
| 100 ng/g:Video:F-100 ng/g:Acclimation:F       | -11.6609746 | -15.6796574 | -7.64229174  | 0         |
| 100 ng/g:Acclimation:M-100 ng/g:Acclimation:F | 5.7963516   | 1.713204    | 9.87949917   | 0.0001322 |
| 1 ng/g:Video:F-1 ng/g:Acclimation:F           | -12.4333276 | -16.5129779 | -8.35367732  | 0         |
| 1 ng/g:Acclimation:M-1 ng/g:Acclimation:F     | -2.8849289  | -7.0309884  | 1.26113063   | 0.559844  |
| 10 ng/g:Video:F-10 ng/g:Acclimation:F         | -18.1191477 | -22.3973623 | -13.84093309 | 0         |
| 10 ng/g:Acclimation:M-10 ng/g:Acclimation:F   | -4.3390355  | -8.4958391  | -0.18223177  | 0.0304779 |
| 100 ng/g:Video:F-Control:Video:F              | -11.1301769 | -15.11523   | -7.1451238   | 0         |
| 1 ng/g:Video:F-Control:Video:F                | -3.3784147  | -7.3935441  | 0.63671473   | 0.2234968 |
| 10 ng/g:Video:F-Control:Video:F               | -10.1082992 | -14.2240444 | -5.99255407  | 0         |
| Control:Video:M-Control:Video:F               | -12.3211013 | -16.306635  | -8.33556762  | 0         |
| 100 ng/g:Video:M-100 ng/g:Video:F             | 5.4095864   | 1.394457    | 9.42471578   | 0.0004383 |
| 1 ng/g:Video:M-1 ng/g:Video:F                 | -12.8327784 | -16.9092394 | -8.75631739  | 0         |



|                                              |             |             |              |           |
|----------------------------------------------|-------------|-------------|--------------|-----------|
| 10 ng/g:Video:M-10 ng/g:Video:F              | -1.9478877  | -6.0359791  | 2.14020376   | 0.9626837 |
| 100 ng/g:Acclimation:M-Control:Acclimation:M | -2.0323457  | -6.1154933  | 2.05080186   | 0.9459573 |
| 1 ng/g:Acclimation:M-Control:Acclimation:M   | -2.1895109  | -6.304932   | 1.92591014   | 0.908635  |
| 10 ng/g:Acclimation:M-Control:Acclimation:M  | -4.687682   | -8.7106683  | -0.66469572  | 0.0065734 |
| Control:Video:M-Control:Acclimation:M        | -20.6805963 | -24.6997557 | -16.66143689 | 0         |
| 100 ng/g:Video:M-100 ng/g:Acclimation:M      | -12.0477398 | -16.1273901 | -7.9680895   | 0         |
| 1 ng/g:Video:M-1 ng/g:Acclimation:M          | -22.3811771 | -26.5240985 | -18.23825574 | 0         |
| 10 ng/g:Video:M-10 ng/g:Acclimation:M        | -15.7279999 | -19.688857  | -11.76714285 | 0         |
| 100 ng/g:Video:M-Control:Video:M             | 6.6005108   | 2.5849044   | 10.61611712  | 0.0000021 |
| 1 ng/g:Video:M-Control:Video:M               | -3.8900918  | -7.9374056  | 0.157222     | 0.0753854 |
| 10 ng/g:Video:M-Control:Video:M              | 0.2649144   | -3.6920557  | 4.22188446   | 1         |

## Data S2. Predator Response Assay Statistical Analysis- F1.

|                      | Df    | Sum Sq   | Mean Sq | F value | Pr(>F)   |     |
|----------------------|-------|----------|---------|---------|----------|-----|
| Treatment            | 3     | 563685   | 187895  | 154.791 | < 2e-16  | *** |
| status               | 1     | 806158   | 806158  | 664.128 | < 2e-16  | *** |
| Sex                  | 1     | 38789    | 38789   | 31.955  | 1.59E-08 | *** |
| Treatment:status     | 3     | 34920    | 11640   | 9.589   | 2.52E-06 | *** |
| Treatment:Sex        | 3     | 174571   | 58190   | 47.938  | < 2e-16  | *** |
| status:Sex           | 1     | 59435    | 59435   | 48.964  | 2.66E-12 | *** |
| Treatment:status:Sex | 3     | 42536    | 14179   | 11.681  | 1.21E-07 | *** |
| Residuals            | 28539 | 34642321 | 1214    |         |          |     |

---

Signif. codes: 0 '\*\*\*' 0.001 '\*\*' 0.01 '\*' 0.05 '.' 0.1 ' ' 1

Tukey's multiple comparisons of means  
95% family-wise confidence level

Fit: aov(formula = duration ~ Treatment \* status \* Sex, data)

| \$Treatment       |           |           |           |          |
|-------------------|-----------|-----------|-----------|----------|
|                   | diff      | lwr       | upr       | p adj    |
| 100 ng/g-Control  | -2.725949 | -4.24E+00 | -1.213634 | 2.16E-05 |
| 1 ng/g-Control    | 9.17E+00  | 7.672275  | 10.66948  | 0.00E+00 |
| 10 ng/g-Control   | 4.37E+00  | 2.905629  | 5.841433  | 0.00E+00 |
| \$status          |           |           |           |          |
|                   | diff      | lwr       | upr       | p adj    |
| Video-Acclimation | -10.62818 | -11.4365  | -9.819868 | 0        |
| \$Sex             |           |           |           |          |
|                   | diff      | lwr       | upr       | p adj    |
| M-F               | 2.330322  | 1.522089  | 3.138555  | 0        |

\$`Treatment:status`

|                                          | diff        | lwr         | upr         | p adj     |
|------------------------------------------|-------------|-------------|-------------|-----------|
| 100 ng/g:Acclimation-Control:Acclimation | -3.6967609  | -6.24E+00   | -1.1521359  | 2.86E-04  |
| 1 ng/g:Acclimation-Control:Acclimation   | 9.57E+00    | 7.0456375   | 12.0885405  | 0.00E+00  |
| 10 ng/g:Acclimation-Control:Acclimation  | 6.49E+00    | 4.0205394   | 8.9598114   | 0.00E+00  |
| Control:Video-Control:Acclimation        | -9.7847597  | -1.23E+01   | -7.3156136  | 0.00E+00  |
| 100 ng/g:Video-100 ng/g:Acclimation      | -7.8738371  | -10.4507025 | -5.2969716  | 0         |
| 1 ng/g:Video-1 ng/g:Acclimation          | -10.5642363 | -13.0960885 | -8.0323841  | 0         |
| 10 ng/g:Video-10 ng/g:Acclimation        | -13.9522644 | -16.3818805 | -11.5226483 | 0         |
| 100 ng/g:Video-Control:Video             | -1.7858382  | -4.2881975  | 0.716521    | 0.3744139 |
| 1 ng/g:Video-Control:Video               | 8.7876124   | 6.3078462   | 11.2673787  | 0         |
| 10 ng/g:Video-Control:Video              | 2.3226707   | -0.1064475  | 4.7517888   | 0.0729287 |

\$`Treatment:Sex`

|                       | diff       | lwr         | upr        | p adj     |
|-----------------------|------------|-------------|------------|-----------|
| 100 ng/g:F-Control:F  | -7.6441336 | 10.18167584 | -5.1065913 | 0         |
| 1 ng/g:F-Control:F    | 2.5933017  | 0.12450426  | 5.0620992  | 0.0314622 |
| 10 ng/g:F-Control:F   | 0.6121297  | -1.81745551 | 3.0417149  | 0.9948648 |
| Control:M-Control:F   | -5.2855111 | -7.75465723 | -2.8163649 | 0         |
| 100 ng/g:M-100 ng/g:F | 4.4796308  | 1.90149822  | 7.0577633  | 0.0000039 |
| 1 ng/g:M-1 ng/g:F     | 8.2419617  | 5.70895477  | 10.7749686 | 0         |
| 10 ng/g:M-10 ng/g:F   | 2.3622897  | -0.06729552 | 4.7918749  | 0.0636475 |
| 100 ng/g:M-Control:M  | 2.1210083  | -0.38983405 | 4.6318507  | 0.170643  |
| 1 ng/g:M-Control:M    | 16.1207745 | 13.58742774 | 18.6541212 | 0         |
| 10 ng/g:M-Control:M   | 8.2599304  | 5.79078428  | 10.7290766 | 0         |

\$`status:Sex`

|                             | diff        | lwr       | upr         | p adj    |
|-----------------------------|-------------|-----------|-------------|----------|
| Video:F-Acclimation:F       | -7.7677877  | -9.259867 | -6.2757086  | 0        |
| Acclimation:M-Acclimation:F | 5.2633407   | 3.75251   | 6.7741717   | 0        |
| Video:M-Video:F             | -0.5066607  | -1.992563 | 0.9792412   | 0.817322 |
| Video:M-Acclimation:M       | -13.5377892 | -15.04252 | -12.0330583 | 0        |

\$`Treatment:status:Sex`

|                                               | diff         | lwr         | upr        | p adj     |
|-----------------------------------------------|--------------|-------------|------------|-----------|
| 100 ng/g:Acclimation:F-Control:Acclimation:F  | -12.19971945 | -16.2904604 | -8.1089785 | 0         |
| 1 ng/g:Acclimation:F-Control:Acclimation:F    | 1.113798943  | -2.8661193  | 5.0937172  | 0.9998867 |
| 10 ng/g:Acclimation:F-Control:Acclimation:F   | 1.513414338  | -2.4027882  | 5.4296169  | 0.9951071 |
| Control:Video:F-Control:Acclimation:F         | -10.07155974 | -13.9862335 | -6.156886  | 0         |
| Control:Acclimation:M-Control:Acclimation:F   | -5.581693362 | -9.5621833  | -1.6012035 | 0.0001772 |
| 100 ng/g:Video:F-100 ng/g:Acclimation:F       | -1.10863006  | -5.3032685  | 3.0860084  | 0.9999452 |
| 100 ng/g:Acclimation:M-100 ng/g:Acclimation:F | 11.12296704  | 6.9664931   | 15.279441  | 0         |
| 1 ng/g:Video:F-1 ng/g:Acclimation:F           | -7.161104033 | -11.1404875 | -3.1817206 | 0.0000001 |
| 1 ng/g:Acclimation:M-1 ng/g:Acclimation:F     | 11.82576255  | 7.742333    | 15.9091921 | 0         |
| 10 ng/g:Video:F-10 ng/g:Acclimation:F         | -11.8471327  | -15.7011255 | -7.9931399 | 0         |
| 10 ng/g:Acclimation:M-10 ng/g:Acclimation:F   | 4.536317318  | 0.6201147   | 8.4525199  | 0.0072142 |
| 100 ng/g:Video:F-Control:Video:F              | -3.236789768 | -7.2599105  | 0.786331   | 0.2946338 |

|                                              |              |             |             |           |
|----------------------------------------------|--------------|-------------|-------------|-----------|
| 1 ng/g:Video:F-Control:Video:F               | 4.024254652  | 0.1101247   | 7.9383846   | 0.0365286 |
| 10 ng/g:Video:F-Control:Video:F              | -0.262158618 | -4.1145979  | 3.5902806   | 1         |
| Control:Video:M-Control:Video:F              | -4.998786896 | -8.9134606  | -1.0841132  | 0.0013181 |
| 100 ng/g:Video:M-100 ng/g:Video:F            | -1.943824349 | -6.0310153  | 2.1433666   | 0.9632867 |
| 1 ng/g:Video:M-1 ng/g:Video:F                | 4.77591797   | 0.7599878   | 8.7918481   | 0.0047242 |
| 10 ng/g:Video:M-10 ng/g:Video:F              | 0.25873609   | -3.5937032  | 4.1111754   | 1         |
| 100 ng/g:Acclimation:M-Control:Acclimation:M | 4.504940948  | 0.4569274   | 8.5529545   | 0.013104  |
| 1 ng/g:Acclimation:M-Control:Acclimation:M   | 18.52125486  | 14.4372682  | 22.6052415  | 0         |
| 10 ng/g:Acclimation:M-Control:Acclimation:M  | 11.63142502  | 7.6509351   | 15.6119149  | 0         |
| Control:Video:M-Control:Acclimation:M        | -9.488653276 | -13.4691432 | -5.5081634  | 0         |
| 100 ng/g:Video:M-100 ng/g:Acclimation:M      | -14.17542145 | -18.223435  | -10.1274079 | 0         |
| 1 ng/g:Video:M-1 ng/g:Acclimation:M          | -14.21094861 | -18.3300018 | -10.0918954 | 0         |
| 10 ng/g:Video:M-10 ng/g:Acclimation:M        | -16.12471393 | -20.0393876 | -12.2100402 | 0         |
| 100 ng/g:Video:M-Control:Video:M             | -0.181827222 | -4.1623171  | 3.7986627   | 1         |
| 1 ng/g:Video:M-Control:Video:M               | 13.79895952  | 9.7824994   | 17.8154197  | 0         |
| 10 ng/g:Video:M-Control:Video:M              | 4.995364368  | 1.0806907   | 8.9100381   | 0.0013357 |

### Data S3. Predator Response Assay Statistical Analysis- F2.

|                      | Df       | Sum Sq   | Mean Sq | F value  | Pr(>F)   |     |
|----------------------|----------|----------|---------|----------|----------|-----|
| Treatment            | 3.00E+00 | 458821   | 152940  | 167.96   | < 2e-16  | *** |
| status               | 1        | 4.87E+05 | 487023  | 5.35E+02 | < 2e-16  | *** |
| Sex                  | 1.00E+00 | 203160   | 203160  | 2.23E+02 | < 2e-16  | *** |
| Treatment:status     | 3.00E+00 | 64808    | 21603   | 2.37E+01 | 2.50E-15 | *** |
| Treatment:Sex        | 3        | 1.73E+05 | 57536   | 6.32E+01 | < 2e-16  | *** |
| status:Sex           | 1.00E+00 | 20014    | 20014   | 2.20E+01 | 2.77E-06 | *** |
| Treatment:status:Sex | 3        | 5.21E+04 | 17381   | 1.91E+01 | 2.32E-12 | *** |
| Residuals            | 29384    | 26756765 | 911     |          |          |     |

---

Signif. codes: 0 '\*\*\*' 0.001 '\*\*' 0.01 '\*' 0.05 '.' 0.1 ' ' 1

Tukey's multiple comparisons of means

95% family-wise confidence level

Fit: aov(formula = duration ~ Treatment \* status \* Sex, data)

| \$Treatment       |            |            |            |           |
|-------------------|------------|------------|------------|-----------|
|                   | diff       | lwr        | upr        | p adj     |
| 100 ng/g-Control  | -1.8885621 | -3.1701508 | -0.6069735 | 0.0008819 |
| 1 ng/g-Control    | 8.0058982  | 6.7293217  | 9.2824748  | 0         |
| 10 ng/g-Control   | -0.7842022 | -2.0762529 | 0.5078486  | 0.4021345 |
| \$status          |            |            |            |           |
|                   | diff       | lwr        | upr        | p adj     |
| Video-Acclimation | -8.141257  | -8.83122   | -7.451293  | 0         |

| \$Sex                                        |              |              |             |           |
|----------------------------------------------|--------------|--------------|-------------|-----------|
|                                              | diff         | lwr          | upr         | p adj     |
| M-F                                          | 5.257377     | 4.567504     | 5.94725     | 0         |
| \$`Treatment:status`                         |              |              |             |           |
|                                              | diff         | lwr          | upr         | p adj     |
| 100 ng/g:Acclimation-Control:Acclimation     | -5.3655316   | -7.5218472   | -3.2092161  | 0         |
| 1 ng/g:Acclimation-Control:Acclimation       | 7.9817395    | 5.833857     | 10.1296221  | 0         |
| 10 ng/g:Acclimation-Control:Acclimation      | -0.7733242   | -2.9472426   | 1.4005942   | 0.9614334 |
| Control:Video-Control:Acclimation            | -9.8791604   | -12.0351862  | -7.7231346  | 0         |
| 100 ng/g:Video-100 ng/g:Acclimation          | -3.0392204   | -5.1601865   | -0.9182542  | 0.0003743 |
| 1 ng/g:Video-1 ng/g:Acclimation              | -9.8316351   | -11.9357008  | -7.7275694  | 0         |
| 10 ng/g:Video-10 ng/g:Acclimation            | -9.9005597   | -12.0565854  | -7.7445339  | 0         |
| 100 ng/g:Video-Control:Video                 | 1.4744084    | -0.6462631   | 3.5950799   | 0.4100642 |
| 1 ng/g:Video-Control:Video                   | 8.0292648    | 5.9168869    | 10.1416427  | 0         |
| 10 ng/g:Video-Control:Video                  | -0.7947235   | -2.9327069   | 1.3432599   | 0.9511671 |
| \$`Treatment:Sex`                            |              |              |             |           |
|                                              | diff         | lwr          | upr         | p adj     |
| 100 ng/g:F-Control:F                         | -2.1816165   | -4.3198873   | -0.04334575 | 0.0416574 |
| 1 ng/g:F-Control:F                           | 5.032369     | 2.9105933    | 7.15414478  | 0         |
| 10 ng/g:F-Control:F                          | 2.9624072    | 0.8066809    | 5.11813357  | 0.0008161 |
| Control:M-Control:F                          | 5.3686121    | 3.2128858    | 7.52433841  | 0         |
| 100 ng/g:M-100 ng/g:F                        | 5.9547209    | 3.8340493    | 8.07539239  | 0         |
| 1 ng/g:M-1 ng/g:F                            | 11.4981813   | 9.3941427    | 13.60221985 | 0         |
| 10 ng/g:M-10 ng/g:F                          | -2.1246067   | -4.2803331   | 0.03111957  | 0.0567682 |
| 100 ng/g:M-Control:M                         | -1.5955077   | -3.7337785   | 0.54276303  | 0.3151102 |
| 1 ng/g:M-Control:M                           | 11.1619382   | 9.0236675    | 13.300209   | 0         |
| 10 ng/g:M-Control:M                          | -4.5308116   | -6.6865379   | -2.37508526 | 0         |
| \$`status:Sex`                               |              |              |             |           |
|                                              | diff         | lwr          | upr         | p adj     |
| Video:F-Acclimation:F                        | -6.497632    | -7.774006    | -5.221258   | 0.00E+00  |
| Acclimation:M-Acclimation:F                  | 6.935244     | 5.645643     | 8.224845    | 0.00E+00  |
| Video:M-Video:F                              | 3.634522     | 2.366239     | 4.902806    | 0.00E+00  |
| Video:M-Acclimation:m                        | -9.798353    | -11.079948   | -8.516759   | 0.00E+00  |
| \$`Treatment:status:Sex`                     |              |              |             |           |
|                                              | diff         | lwr          | upr         | p adj     |
| 100 ng/g:Acclimation:F-Control:Acclimation:F | -7.32037805  | -10.76745826 | -3.87329784 | 0         |
| 1 ng/g:Acclimation:F-Control:Acclimation:F   | 1.913145441  | -1.50734337  | 5.33363425  | 0.8689352 |
| 10 ng/g:Acclimation:F-Control:Acclimation:F  | 3.144363842  | -0.33085626  | 6.61958395  | 0.1301892 |
| Control:Video:F-Control:Acclimation:F        | -10.56140995 | -14.00802694 | -7.11479297 | 0         |
| Control:Acclimation:M-Control:Acclimation:F  | 4.674991695  | 1.19977159   | 8.1502118   | 0.0004532 |
| 100 ng/g:Video:F-100 ng/g:Acclimation:F      | -0.452370862 | -3.84294156  | 2.93819983  | 1         |

|                                           |              |              |              |           |
|-------------------------------------------|--------------|--------------|--------------|-----------|
| 100 ng/g:Acclimation:M-100                |              |              |              |           |
| ng/g:Acclimation:F                        | 8.584684527  | 5.16597583   | 12.00339322  | 0         |
| 1 ng/g:Video:F-1 ng/g:Acclimation:F       | -4.425232414 | -7.76240496  | -1.08805987  | 0.0006156 |
| 1 ng/g:Acclimation:M-1 ng/g:Acclimation:F | 17.08334409  | 13.69144921  | 20.47523897  | 0         |
| 10 ng/g:Video:F-10 ng/g:Acclimation:F     | -10.91935735 | -14.36597433 | -7.47274036  | 0         |
| 10 ng/g:Acclimation:M-10                  |              |              |              |           |
| ng/g:Acclimation:F                        | -3.160384407 | -6.63560451  | 0.3148357    | 0.1247815 |
| 100 ng/g:Video:F-Control:Video:F          | 2.788661042  | -0.60143871  | 6.17876079   | 0.258299  |
| 1 ng/g:Video:F-Control:Video:F            | 8.049322982  | 4.68537507   | 11.41327089  | 0         |
| 10 ng/g:Video:F-Control:Video:F           | 2.786416448  | -0.63135805  | 6.20419094   | 0.2726896 |
| Control:Video:M-Control:Video:F           | 6.03949082   | 2.62171633   | 9.45726531   | 0.0000002 |
| 100 ng/g:Video:M-100 ng/g:Video:F         | 3.41098551   | 0.04878829   | 6.77318273   | 0.0425984 |
| 1 ng/g:Video:M-1 ng/g:Video:F             | 6.096138589  | 2.76031195   | 9.43196523   | 0         |
| 10 ng/g:Video:M-10 ng/g:Video:F           | -1.122789016 | -4.54056351  | 2.29498548   | 0.9992044 |
| 100 ng/g:Acclimation:M-                   |              |              |              |           |
| Control:Acclimation:M                     | -3.410685218 | -6.85776543  | 0.03639499   | 0.056052  |
| 1 ng/g:Acclimation:M-                     |              |              |              |           |
| Control:Acclimation:M                     | 14.32149783  | 10.87441762  | 17.76857804  | 0         |
| 10 ng/g:Acclimation:M-                    |              |              |              |           |
| Control:Acclimation:M                     | -4.69101226  | -8.16623237  | -1.21579215  | 0.0004207 |
| Control:Video:M-Control:Acclimation:M     | -9.196910829 | -12.64352781 | -5.75029384  | 0         |
| 100 ng/g:Video:M-100 ng/g:Acclimation:M   | -5.626069879 | -9.01664058  | -2.23549918  | 0.0000016 |
| 1 ng/g:Video:M-1 ng/g:Acclimation:M       | -15.41243791 | -18.80300861 | -12.02186721 | 0         |
| 10 ng/g:Video:M-10 ng/g:Acclimation:M     | -8.881761957 | -12.32837894 | -5.43514497  | 0         |
| 100 ng/g:Video:M-Control:Video:M          | 0.160155732  | -3.22994402  | 3.55025548   | 1         |
| 1 ng/g:Video:M-Control:Video:M            | 8.105970751  | 4.715871     | 11.4960705   | 0         |
| 10 ng/g:Video:M-Control:Video:M           | -4.375863388 | -7.79363788  | -0.95808889  | 0.0012519 |

#### Data S4. Schooling Response Assay Statistical Analysis- F0.

|                      | Df    | Sum Sq   | Mean Sq | F value | Pr(>F)   |     |
|----------------------|-------|----------|---------|---------|----------|-----|
| Treatment            | 3     | 95569    | 31856   | 19.707  | 9.29E-13 | *** |
| status               | 1     | 732543   | 732543  | 453.18  | < 2e-16  | *** |
| Sex                  | 1     | 946      | 946     | 0.585   | 0.444    |     |
| Treatment:status     | 3     | 183899   | 61300   | 37.922  | < 2e-16  | *** |
| Treatment:Sex        | 3     | 745272   | 248424  | 153.685 | < 2e-16  | *** |
| status:Sex           | 1     | 75294    | 75294   | 46.58   | 8.95E-12 | *** |
| Treatment:status:Sex | 3     | 145680   | 48560   | 30.041  | < 2e-16  | *** |
| Residuals            | 31900 | 51564769 | 1616    |         |          |     |

---

Signif. codes: 0 '\*\*\*' 0.001 '\*\*' 0.01 '\*' 0.05 '.' 0.1 ' ' 1

Tukey's multiple comparisons of means

95% family-wise confidence level

Fit: aov(formula = duration ~ Treatment \* status \* Sex, data)

| \$Treatment                              |             |            |              |           |
|------------------------------------------|-------------|------------|--------------|-----------|
|                                          | diff        | lwr        | upr          | p adj     |
| 100 ng/g-Control                         | -4.3776239  | -6.000786  | -2.7544618   | 0         |
| 1 ng/g-Control                           | -2.952512   | -4.5819092 | -1.3231148   | 0.0000192 |
| 10 ng/g-Control                          | -4.0098354  | -5.6454755 | -2.3741953   | 0         |
| \$status                                 |             |            |              |           |
|                                          | diff        | lwr        | upr          | p adj     |
| Video-Acclimation                        | -9.583035   | -10.46533  | -8.700736    | 0         |
| \$Sex                                    |             |            |              |           |
|                                          | diff        | lwr        | upr          | p adj     |
| M-F                                      | -0.3441144  | -1.22639   | 0.538161     | 0.4446016 |
| \$`Treatment:status`                     |             |            |              |           |
|                                          | diff        | lwr        | upr          | p adj     |
| 100 ng/g:Acclimation-Control:Acclimation | -4.862157   | -7.593187  | -2.1311273   | 0.0000019 |
| 1 ng/g:Acclimation-Control:Acclimation   | -2.5643161  | -5.30593   | 0.177298     | 0.0865455 |
| 10 ng/g:Acclimation-Control:Acclimation  | 1.5898677   | -1.162069  | 4.3418042    | 0.653421  |
| Control:Video-Control:Acclimation        | -6.9427727  | -9.641262  | -4.2442833   | 0         |
| 100 ng/g:Video-100 ng/g:Acclimation      | -5.9880249  | -8.706591  | -3.2694585   | 0         |
| 1 ng/g:Video-1 ng/g:Acclimation          | -7.703668   | -10.442934 | -4.9644022   | 0         |
| 10 ng/g:Video-10 ng/g:Acclimation        | -17.9577591 | -20.717655 | -15.1978629  | 0         |
| 100 ng/g:Video-Control:Video             | -3.9074092  | -6.593284  | -1.221534    | 0.0002776 |
| 1 ng/g:Video-Control:Video               | -3.3252113  | -6.021315  | -0.6291078   | 0.00459   |
| 10 ng/g:Video-Control:Video              | -9.4251187  | -12.131725 | -6.7185124   | 0         |
| \$`Treatment:Sex`                        |             |            |              |           |
|                                          | diff        | lwr        | upr          | p adj     |
| 100 ng/g:F-Control:F                     | -16.148205  | -1.88E+01  | -13.45008504 | 0         |
| 1 ng/g:F-Control:F                       | -3.1963028  | -5.91E+00  | -0.47764763  | 0.0087634 |
| 10 ng/g:F-Control:F                      | -7.2920349  | -1.01E+01  | -4.505439224 | 0         |
| Control:M-Control:F                      | -8.0852954  | -1.08E+01  | -5.387175402 | 0         |
| 100 ng/g:M-100 ng/g:F                    | 15.6910518  | 1.30E+01   | 18.40954284  | 0         |
| 1 ng/g:M-1 ng/g:F                        | -7.5987048  | -1.03E+01  | -4.859831303 | 0         |
| 10 ng/g:M-10 ng/g:F                      | -1.4131811  | -4.18E+00  | 1.354532369  | 0.7814265 |
| 100 ng/g:M-Control:M                     | 7.6281421   | 4.91E+00   | 10.3466332   | 0         |
| 1 ng/g:M-Control:M                       | -2.7097122  | -5.43E+00  | 0.008778856  | 0.0514517 |
| 10 ng/g:M-Control:M                      | -0.6199206  | -3.30E+00  | 2.058693574  | 0.9969787 |
| \$`status:Sex`                           |             |            |              |           |
|                                          | diff        | lwr        | upr          | p adj     |
| Video:F-Acclimation:F                    | -6.466132   | -8.114076  | -4.818188    | 0.00E+00  |
| Acclimation:M-Acclimation:F              | 2.777949    | 1.128633   | 4.427266     | 8.90E-05  |
| Video:M-Video:F                          | -3.363463   | -4.985414  | -1.741512    | 6.00E-07  |
| Video:M-Acclimation:M                    | -12.607544  | -14.230891 | -10.984198   | 0.00E+00  |
| \$`Treatment:status:Sex`                 |             |            |              |           |
|                                          | diff        | lwr        | upr          | p adj     |

|                                               |             |             |             |           |
|-----------------------------------------------|-------------|-------------|-------------|-----------|
| 100 ng/g:Acclimation:F-Control:Acclimation:F  | -10.7825769 | -15.1319167 | -6.4332372  | 0         |
| 1 ng/g:Acclimation:F-Control:Acclimation:F    | -0.0402764  | -4.4230132  | 4.3424604   | 1         |
| 10 ng/g:Acclimation:F-Control:Acclimation:F   | 2.5134869   | -1.9784919  | 7.0054657   | 0.8685609 |
| Control:Video:F-Control:Acclimation:F         | 2.4294804   | -1.8845732  | 6.743534    | 0.862631  |
| Control:Acclimation:M-Control:Acclimation:F   | 1.4397337   | -2.909606   | 5.7890735   | 0.9991303 |
| 100 ng/g:Video:F-100 ng/g:Acclimation:F       | -8.126511   | -12.4400531 | -3.8129689  | 0         |
| 100 ng/g:Acclimation:M-100 ng/g:Acclimation:F | 13.485313   | 9.1025762   | 17.8680497  | 0         |
| 1 ng/g:Video:F-1 ng/g:Acclimation:F           | -3.7795408  | -8.1585237  | 0.5994421   | 0.1874647 |
| 1 ng/g:Acclimation:M-1 ng/g:Acclimation:F     | -3.6083878  | -8.024269   | 0.8074934   | 0.2689734 |
| 10 ng/g:Video:F-10 ng/g:Acclimation:F         | -16.8614551 | -21.4535713 | -12.2693388 | 0         |
| 10 ng/g:Acclimation:M-10 ng/g:Acclimation:F   | -0.3784363  | -4.8402335  | 4.0833609   | 1         |
| 100 ng/g:Video:F-Control:Video:F              | -21.3385683 | -25.616529  | -17.0606076 | 0         |
| 1 ng/g:Video:F-Control:Video:F                | -6.2492976  | -10.5595375 | -1.9390577  | 0.0000784 |
| 10 ng/g:Video:F-Control:Video:F               | -16.7774485 | -21.1956741 | -12.359223  | 0         |
| Control:Video:M-Control:Video:F               | -17.3006402 | -21.5786009 | -13.0226794 | 0         |
| 100 ng/g:Video:M-100 ng/g:Video:F             | 17.8235264  | 13.5137984  | 22.1332543  | 0         |
| 1 ng/g:Video:M-1 ng/g:Video:F                 | -11.4565987 | -15.7983696 | -7.1148277  | 0         |
| 10 ng/g:Video:M-10 ng/g:Video:F               | -2.4143892  | -6.8024326  | 1.9736542   | 0.8831778 |
| 100 ng/g:Acclimation:M-Control:Acclimation:M  | 1.2630023   | -3.1197345  | 5.6457391   | 0.9998366 |
| 1 ng/g:Acclimation:M-Control:Acclimation:M    | -5.088398   | -9.4711347  | -0.7056612  | 0.0069596 |
| 10 ng/g:Acclimation:M-Control:Acclimation:M   | 0.6953168   | -3.6228445  | 5.0134781   | 0.9999999 |
| Control:Video:M-Control:Acclimation:M         | -16.3108935 | -20.6244356 | -11.9973514 | 0         |
| 100 ng/g:Video:M-100 ng/g:Acclimation:M       | -3.7882976  | -8.1672805  | 0.5906853   | 0.1843609 |
| 1 ng/g:Video:M-1 ng/g:Acclimation:M           | -11.6277516 | -16.0067345 | -7.2487688  | 0         |
| 10 ng/g:Video:M-10 ng/g:Acclimation:M         | -18.897408  | -23.1488815 | -14.6459344 | 0         |
| 100 ng/g:Video:M-Control:Video:M              | 13.7855982  | 9.4758702   | 18.0953262  | 0         |
| 1 ng/g:Video:M-Control:Video:M                | -0.4052561  | -4.714984   | 3.9044719   | 1         |
| 10 ng/g:Video:M-Control:Video:M               | -1.8911976  | -6.1379794  | 2.3555842   | 0.9797647 |

#### Data S5. Schooling Response Assay Statistical Analysis- F1.

|                      | Df    | Sum Sq   | Mean Sq | F value | Pr(>F)   |     |
|----------------------|-------|----------|---------|---------|----------|-----|
| Treatment            | 3     | 900295   | 300098  | 218.66  | < 2e-16  | *** |
| status               | 1     | 191755   | 191755  | 139.718 | < 2e-16  | *** |
| Sex                  | 1     | 1312     | 1312    | 0.956   | 0.328    |     |
| Treatment:status     | 3     | 41593    | 13864   | 10.102  | 1.20E-06 | *** |
| Treatment:Sex        | 3     | 234056   | 78019   | 56.847  | < 2e-16  | *** |
| status:Sex           | 1     | 52672    | 52672   | 38.378  | 5.91E-10 | *** |
| Treatment:status:Sex | 3     | 30053    | 10018   | 7.299   | 6.88E-05 | *** |
| Residuals            | 28544 | 39174916 | 1372    |         |          |     |

---

Signif. codes: 0 '\*\*\*' 0.001 '\*\*' 0.01 '\*' 0.05 '.' 0.1 ' ' 1

Tukey's multiple comparisons of means

95% family-wise confidence level

Fit: aov(formula = duration ~ Treatment \* status \* Sex, data)

| \$Treatment                              |              |             |            |           |
|------------------------------------------|--------------|-------------|------------|-----------|
|                                          | diff         | lwr         | upr        | p adj     |
| 100 ng/g-Control                         | 9.890311     | 8.276008    | 11.504613  | 0         |
| 1 ng/g-Control                           | 15.459686    | 13.859844   | 17.059527  | 0         |
| 10 ng/g-Control                          | 6.004046     | 4.442803    | 7.56529    | 0         |
| \$status                                 |              |             |            |           |
|                                          | diff         | lwr         | upr        | p adj     |
| Video-Acclimation                        | -5.183034    | -6.042455   | -4.323613  | 0         |
| \$Sex                                    |              |             |            |           |
|                                          | diff         | lwr         | upr        | p adj     |
| M-F                                      | 0.4284683    | -0.4308636  | 1.2878     | 0.3284452 |
| \$`Treatment:status`                     |              |             |            |           |
|                                          | diff         | lwr         | upr        | p adj     |
| 100 ng/g:Acclimation-Control:Acclimation | 8.455576303  | 5.7394591   | 11.171693  | 0         |
| 1 ng/g:Acclimation-Control:Acclimation   | 16.73367553  | 14.0418895  | 19.425462  | 0         |
| 10 ng/g:Acclimation-Control:Acclimation  | 7.752553573  | 5.125709    | 10.379398  | 0         |
| Control:Video-Control:Acclimation        | -4.311420002 | -6.9583303  | -1.66451   | 0.0000218 |
| 100 ng/g:Video-100 ng/g:Acclimation      | -1.488991903 | -4.2288044  | 1.250821   | 0.721375  |
| 1 ng/g:Video-1 ng/g:Acclimation          | -6.817629752 | -9.5097897  | -4.12547   | 0         |
| 10 ng/g:Video-10 ng/g:Acclimation        | -7.751106321 | -10.3139662 | -5.188246  | 0         |
| 100 ng/g:Video-Control:Video             | 11.2780044   | 8.6067848   | 13.949224  | 0         |
| 1 ng/g:Video-Control:Video               | 14.22746578  | 11.5801752  | 16.874756  | 0         |
| 10 ng/g:Video-Control:Video              | 4.312867254  | 1.7294446   | 6.89629    | 0.0000116 |
| \$`Treatment:Sex`                        |              |             |            |           |
|                                          | diff         | lwr         | upr        | p adj     |
| 100 ng/g:F-Control:F                     | 4.6230271    | 1.92481682  | 7.3212374  | 0.0000057 |
| 1 ng/g:F-Control:F                       | 10.7354849   | 8.11037207  | 13.3605977 | 0         |
| 10 ng/g:F-Control:F                      | 7.2589721    | 4.67588548  | 9.8420587  | 0         |
| Control:M-Control:F                      | -3.7636722   | -6.41168639 | -1.115658  | 0.0004379 |
| 100 ng/g:M-100 ng/g:F                    | 6.6585453    | 3.9173646   | 9.3997259  | 0         |
| 1 ng/g:M-1 ng/g:F                        | 6.0176915    | 3.32430376  | 8.7110793  | 0         |
| 10 ng/g:M-10 ng/g:F                      | -6.1480679   | -8.71057183 | -3.585564  | 0         |
| 100 ng/g:M-Control:M                     | 15.0452446   | 12.35345861 | 17.7370306 | 0         |
| 1 ng/g:M-Control:M                       | 20.5168486   | 17.80113516 | 23.232562  | 0         |
| 10 ng/g:M-Control:M                      | 4.8745764    | 2.24663629  | 7.5025165  | 0.0000005 |
| \$`status:Sex`                           |              |             |            |           |
|                                          | diff         | lwr         | upr        | p adj     |
| Video:F-Acclimation:F                    | -7.875672    | -9.462117   | -6.2892261 | 0         |
| Acclimation:M-Acclimation:F              | -2.332246    | -3.938621   | -0.7258709 | 0.0010985 |
| Video:M-Video:F                          | 3.098667     | 1.518846    | 4.6784889  | 0.0000028 |
| Video:M-Acclimation:M                    | -2.444758    | -4.044592   | -0.8449248 | 0.0005013 |



\$`Treatment:status:Sex`

|                                               | diff      | lwr          | upr        | p adj     |
|-----------------------------------------------|-----------|--------------|------------|-----------|
| 100 ng/g:Acclimation:F-Control:Acclimation:F  | 8.70E-01  | -3.47963831  | 5.2198655  | 0.9999987 |
| 1 ng/g:Acclimation:F-Control:Acclimation:F    | 1.16E+01  | 7.33972955   | 15.8035542 | 0         |
| 10 ng/g:Acclimation:F-Control:Acclimation:F   | 9.45E+00  | 5.28890765   | 13.6172325 | 0         |
| Control:Video:F-Control:Acclimation:F         | -8.01E+00 | -12.17424891 | -3.8491755 | 0         |
| Control:Acclimation:M-Control:Acclimation:F   | -7.66E+00 | -11.92419017 | -3.3865274 | 0.0000001 |
| 100 ng/g:Video:F-100 ng/g:Acclimation:F       | -6.29E-01 | -5.08915931  | 3.8312964  | 1         |
| 100 ng/g:Acclimation:M-100 ng/g:Acclimation:F | 7.50E+00  | 3.08376457   | 11.9218124 | 0.0000007 |
| 1 ng/g:Video:F-1 ng/g:Acclimation:F           | -9.66E+00 | -13.88795486 | -5.4252676 | 0         |
| 1 ng/g:Acclimation:M-1 ng/g:Acclimation:F     | 3.03E+00  | -1.31366591  | 7.3702892  | 0.555576  |
| 10 ng/g:Video:F-10 ng/g:Acclimation:F         | -1.23E+01 | -16.42495134 | -8.2309896 | 0         |
| 10 ng/g:Acclimation:M-10 ng/g:Acclimation:F   | -1.08E+01 | -14.93219443 | -6.6702318 | 0         |
| 100 ng/g:Video:F-Control:Video:F              | 8.25E+00  | 3.97504408   | 12.5307445 | 0         |
| 1 ng/g:Video:F-Control:Video:F                | 9.93E+00  | 5.7647843    | 14.0887014 | 0         |
| 10 ng/g:Video:F-Control:Video:F               | 5.14E+00  | 1.04148324   | 9.2321403  | 0.0018513 |
| Control:Video:M-Control:Video:F               | 4.18E-04  | -4.19784919  | 4.1986854  | 1         |
| 100 ng/g:Video:M-100 ng/g:Video:F             | 5.84E+00  | 1.49600498   | 10.1879593 | 0.0004606 |
| 1 ng/g:Video:M-1 ng/g:Video:F                 | 8.91E+00  | 4.63885457   | 13.1792633 | 0         |
| 10 ng/g:Video:M-10 ng/g:Video:F               | -1.65E+00 | -5.71018075  | 2.4152111  | 0.9919222 |
| 100 ng/g:Acclimation:M-Control:Acclimation:M  | 1.60E+01  | 11.68886555  | 20.3676562 | 0         |
| 1 ng/g:Acclimation:M-Control:Acclimation:M    | 2.23E+01  | 17.87734382  | 26.6332808 | 0         |
| 10 ng/g:Acclimation:M-Control:Acclimation:M   | 6.31E+00  | 2.07074559   | 10.5436859 | 0.0000394 |
| Control:Video:M-Control:Acclimation:M         | -3.56E-01 | -4.6596148   | 3.9477443  | 1         |
| 100 ng/g:Video:M-100 ng/g:Acclimation:M       | -2.29E+00 | -6.59341737  | 2.0139417  | 0.9086145 |
| 1 ng/g:Video:M-1 ng/g:Acclimation:M           | -3.78E+00 | -8.15572068  | 0.6039929  | 0.189049  |
| 10 ng/g:Video:M-10 ng/g:Acclimation:M         | -3.17E+00 | -7.27122304  | 0.9227387  | 0.3605186 |
| 100 ng/g:Video:M-Control:Video:M              | 1.41E+01  | 9.82679348   | 18.3621232 | 0         |
| 1 ng/g:Video:M-Control:Video:M                | 1.88E+01  | 14.52978328  | 23.1409841 | 0         |
| 10 ng/g:Video:M-Control:Video:M               | 3.49E+00  | -0.67753221  | 7.6553498  | 0.2306849 |

#### Data S6. Schooling Response Assay Statistical Analysis- F2.

|                      | Df    | Sum Sq   | Mean Sq | F value | Pr(>F)   |     |
|----------------------|-------|----------|---------|---------|----------|-----|
| Treatment            | 3     | 854750   | 284917  | 215.51  | < 2e-16  | *** |
| status               | 1     | 72363    | 72363   | 54.735  | 1.42E-13 | *** |
| Sex                  | 1     | 26319    | 26319   | 19.908  | 8.16E-06 | *** |
| Treatment:status     | 3     | 25410    | 8470    | 6.407   | 0.000247 | *** |
| Treatment:Sex        | 3     | 686087   | 228696  | 172.985 | < 2e-16  | *** |
| status:Sex           | 1     | 245      | 245     | 0.185   | 0.66674  |     |
| Treatment:status:Sex | 3     | 58226    | 19409   | 14.681  | 1.50E-09 | *** |
| Residuals            | 29431 | 38909437 | 1322    |         |          |     |

---

Signif. codes: 0 '\*\*\*' 0.001 '\*\*' 0.01 '\*' 0.05 '.' 0.1 ' ' 1

Tukey's multiple comparisons of means

95% family-wise confidence level

Fit: aov(formula = duration ~ Treatment \* status \* Sex, data)

\$Treatment

|                  | diff       | lwr       | upr      | p adj     |
|------------------|------------|-----------|----------|-----------|
| 100 ng/g-Control | -0.3022322 | -1.846463 | 1.241999 | 0.9584333 |
| 1 ng/g-Control   | 12.2026617 | 10.670343 | 13.73498 | 0         |
| 10 ng/g-Control  | 0.1239089  | -1.43691  | 1.684728 | 0.9970001 |

\$status

|                   | diff      | lwr       | upr       | p adj |
|-------------------|-----------|-----------|-----------|-------|
| Video-Acclimation | -3.135553 | -3.966229 | -2.304876 | 0     |

\$Sex

|     | diff      | lwr       | upr       | p adj    |
|-----|-----------|-----------|-----------|----------|
| M-F | -1.890781 | -2.721366 | -1.060197 | 8.10E-06 |

\$`Treatment:status`

|                                          | diff       | lwr        | upr         | p adj     |
|------------------------------------------|------------|------------|-------------|-----------|
| 100 ng/g:Acclimation-Control:Acclimation | -0.0955044 | -2.6937245 | 2.50271567  | 1         |
| 1 ng/g:Acclimation-Control:Acclimation   | 14.450081  | 11.8719041 | 17.02825798 | 0         |
| 10 ng/g:Acclimation-Control:Acclimation  | 1.696351   | -0.9253059 | 4.31800779  | 0.5084682 |
| Control:Video-Control:Acclimation        | -1.1242617 | -3.7221326 | 1.47360925  | 0.8948043 |
| 100 ng/g:Video-100 ng/g:Acclimation      | -1.5309393 | -4.0865656 | 1.02468696  | 0.6093441 |
| 1 ng/g:Video-1 ng/g:Acclimation          | -5.5454144 | -8.0607921 | -3.0300367  | 0         |
| 10 ng/g:Video-10 ng/g:Acclimation        | -4.2455883 | -6.8564969 | -1.6346798  | 0.0000228 |
| 100 ng/g:Video-Control:Video             | -0.5021821 | -3.0574534 | 2.05308925  | 0.9989397 |
| 1 ng/g:Video-Control:Video               | 10.0289283 | 7.4933688  | 12.56448781 | 0         |
| 10 ng/g:Video-Control:Video              | -1.4249757 | -4.0119995 | 1.16204808  | 0.7071847 |

\$`Treatment:Sex`

|                       | diff       | lwr        | upr        | p adj     |
|-----------------------|------------|------------|------------|-----------|
| 100 ng/g:f-Control:f  | -1.752754  | -4.329231  | 0.8237233  | 0.4399547 |
| 1 ng/g:f-Control:f    | 18.388127  | 15.831525  | 20.9447288 | 0         |
| 10 ng/g:f-Control:f   | 10.842419  | 8.231503   | 13.4533352 | 0         |
| Control:M-Control:F   | 5.75217    | 3.15466    | 8.3496798  | 0         |
| 100 ng/g:M-100 ng/g:F | 8.653213   | 6.097942   | 11.2084846 | 0         |
| 1 ng/g:M-1 ng/g:F     | -6.618761  | -9.133789  | -4.1037323 | 0         |
| 10 ng/g:M-10 ng/g:F   | -15.525824 | -18.13674  | -12.914908 | 0         |
| 100 ng/g:M-Control:M  | 1.14829    | -1.428188  | 3.7247668  | 0.8791617 |
| 1 ng/g:M-Control:M    | 6.017197   | 3.460595   | 8.5737984  | 0         |
| 10 ng/g:M-Control:M   | -10.435574 | -13.033084 | -7.8380644 | 0         |

\$`status:Sex`

|                             | diff      | lwr        | upr        | p adj     |
|-----------------------------|-----------|------------|------------|-----------|
| Video:F-Acclimation:F       | -2.949522 | -4.4912116 | -1.4078323 | 0.0000053 |
| Acclimation:M-Acclimation:F | -1.705571 | -3.256924  | -0.154218  | 0.0244704 |
| Video:M-Video:F             | -2.070592 | -3.5987916 | -0.5423923 | 0.0028125 |
| Video:M-Acclimation:M       | -3.314543 | -4.8524907 | -1.7765952 | 0.0000002 |

\$`Treatment:status:Sex`

|                                               | diff        | lwr         | upr         | p adj     |
|-----------------------------------------------|-------------|-------------|-------------|-----------|
| 100 ng/g:Acclimation:F-Control:Acclimation:F  | -3.347436   | -7.5009435  | 0.8060716   | 0.2917485 |
| 1 ng/g:Acclimation:F-Control:Acclimation:F    | 17.9026913  | 13.7812247  | 22.024158   | 0         |
| 10 ng/g:Acclimation:F-Control:Acclimation:F   | 13.2438174  | 9.0492635   | 17.4383714  | 0         |
| Control:Video:F-Control:Acclimation:F         | -2.8165919  | -6.9695413  | 1.3363575   | 0.6059299 |
| Control:Acclimation:M-Control:Acclimation:F   | 4.0303017   | -0.1571126  | 8.217716    | 0.0743696 |
| 100 ng/g:Video:F-100 ng/g:Acclimation:F       | 0.3204875   | -3.7649298  | 4.4059048   | 1         |
| 100 ng/g:Acclimation:M-100 ng/g:Acclimation:F | 10.5341649  | 6.4148432   | 14.6534866  | 0         |
| 1 ng/g:Video:F-1 ng/g:Acclimation:F           | -1.8616366  | -5.8827126  | 2.1594394   | 0.9710764 |
| 1 ng/g:Acclimation:M-1 ng/g:Acclimation:F     | -2.8749189  | -6.9293653  | 1.1795276   | 0.5250712 |
| 10 ng/g:Video:F-10 ng/g:Acclimation:F         | -7.6135509  | -11.8086956 | -3.4184062  | 0.0000001 |
| 10 ng/g:Acclimation:M-10 ng/g:Acclimation:F   | -18.9870927 | -23.1816467 | -14.7925387 | 0         |
| 100 ng/g:Video:F-Control:Video:F              | -0.2103566  | -4.2952064  | 3.8744932   | 1         |
| 1 ng/g:Video:F-Control:Video:F                | 18.8576466  | 14.8043081  | 22.9109851  | 0         |
| 10 ng/g:Video:F-Control:Video:F               | 8.4468584   | 4.2933123   | 12.6004044  | 0         |
| Control:Video:M-Control:Video:F               | 7.4211628   | 3.3029668   | 11.5393589  | 0.0000001 |
| 100 ng/g:Video:M-100 ng/g:Video:F             | 6.837512    | 2.7862829   | 10.888741   | 0.0000009 |
| 1 ng/g:Video:M-1 ng/g:Video:F                 | -10.2362737 | -14.2236999 | -6.2488475  | 0         |
| 10 ng/g:Video:M-10 ng/g:Video:F               | -12.1295791 | -16.2831252 | -7.9760331  | 0         |
| 100 ng/g:Acclimation:M-Control:Acclimation:M  | 3.1564272   | -0.9970803  | 7.3099348   | 0.3957741 |
| 1 ng/g:Acclimation:M-Control:Acclimation:M    | 10.9974708  | 6.8760041   | 15.1189374  | 0         |
| 10 ng/g:Acclimation:M-Control:Acclimation:M   | -9.7735769  | -13.9609912 | -5.5861627  | 0         |
| Control:Video:M-Control:Acclimation:M         | 0.5742693   | -3.5786801  | 4.7272187   | 1         |
| 100 ng/g:Video:M-100 ng/g:Acclimation:M       | -3.3761654  | -7.4615827  | 0.7092518   | 0.2510069 |
| 1 ng/g:Video:M-1 ng/g:Acclimation:M           | -9.2229915  | -13.2440674 | -5.2019155  | 0         |
| 10 ng/g:Video:M-10 ng/g:Acclimation:M         | -0.7560374  | -4.9089868  | 3.396912    | 0.9999996 |
| 100 ng/g:Video:M-Control:Video:M              | -0.7940075  | -4.8788573  | 3.2908423   | 0.9999991 |
| 1 ng/g:Video:M-Control:Video:M                | 1.20021     | -2.8531285  | 5.2535486   | 0.9997715 |
| 10 ng/g:Video:M-Control:Video:M               | -11.1038836 | -15.2220797 | -6.9856875  | 0         |

## Data S7. Startle Response Assay Statistical Analysis- F0.

### Repeat measure ANOVA

Error: Tap

|           | Df | Sum Sq   | Mean Sq  | F value  | Pr(>F) |
|-----------|----|----------|----------|----------|--------|
| Treatment | 2  | 7.179    | 3.59E+00 | 1.11E+00 | 0.475  |
| Residuals | 2  | 6.49E+00 | 3.245    |          |        |

Error:

Tap:Treatment

|           | Df | Sum Sq   | Mean Sq  | F value  | Pr(>F)     |
|-----------|----|----------|----------|----------|------------|
| Treatment | 3  | 5.69E+01 | 1.90E+01 | 1.05E+01 | 0.00148 ** |
| Sex       | 1  | 0.25     | 0.248    | 0.137    | 0.71829    |
| Residuals | 11 | 19.9     | 1.809    |          |            |

---

Signif. codes: 0 '\*\*\*' 0.001 '\*\*' 0.01 '\*' 0.05 '.' 0.1 ' ' 1

Error: Within

|           | Df   | Sum Sq | Mean Sq | F value | Pr(>F) |
|-----------|------|--------|---------|---------|--------|
| Sex       | 1    | 2      | 2.389   | 0.67    | 0.413  |
| Residuals | 1307 | 4659   | 3.564   |         |        |

Tukey's multiple comparisons of means

95% family-wise confidence level

Fit: aov(formula = mean.distance ~ Treatment + Tap + Sex, data = (sum))

\$Treatment

|                  | diff      | lwr       | upr       | p adj     |
|------------------|-----------|-----------|-----------|-----------|
| 100 ng/g-Control | 0.3923129 | 0.0185067 | 0.7661191 | 0.0353862 |
| 1 ng/g-Control   | -0.173236 | -0.547615 | 0.2011426 | 0.6331063 |
| 10 ng/g-Control  | -0.002461 | -0.378004 | 0.3730816 | 0.9999983 |

\$Sex

|     | diff      | lwr       | upr       | p adj     |
|-----|-----------|-----------|-----------|-----------|
| M-F | 0.0848896 | -0.117905 | 0.2876843 | 0.4116851 |

**Data S8.** Startle Response Assay Statistical Analysis- F1.

Repeat measure ANOVA

Error: Tap

|           | Df | Sum Sq | Mean Sq | F value | Pr(>F) |
|-----------|----|--------|---------|---------|--------|
| Treatment | 1  | 0.307  | 0.3065  | 0.128   | 0.745  |
| Residuals | 3  | 7.204  | 2.4015  |         |        |

Error:Tap:Treatment

|           | Df | Sum Sq | Mean Sq | F value | Pr(>F)   |
|-----------|----|--------|---------|---------|----------|
| Treatment | 3  | 369    | 122.99  | 103.83  | 2.37E-08 |
| Sex       | 1  | 0.1    | 0.15    | 0.124   | 0.732    |
| Residuals | 11 | 13     | 1.18    |         |          |

---

Signif. Codes: 0 '\*\*\*' 0.001 '\*\*' 0.01 '\*' 0.05 '.' 0.1 ' ' 1

Error: Within

|           | Df   | Sum Sq | Mean Sq | F value | Pr(>F)   |
|-----------|------|--------|---------|---------|----------|
| Sex       | 1    | 103    | 102.83  | 18.46   | 1.87E-05 |
| Residuals | 1178 | 6561   | 5.57    |         |          |

---

Signif. Codes: 0 '\*\*\*' 0.001 '\*\*' 0.01 '\*' 0.05 '.' 0.1 ' ' 1

#### Tukey's multiple comparisons of means

95% family-wise confidence level

Fit: aov(formula = mean.distance ~ Treatment + Tap + Sex, data = (sum))

\$Treatment

|                  | diff      | lwr        | upr       | p adj     |
|------------------|-----------|------------|-----------|-----------|
| 100 ng/g-Control | 0.3378618 | -0.1607531 | 0.8364767 | 0.301743  |
| 1 ng/g-Control   | 1.5090172 | 1.0130805  | 2.0049538 | 0         |
| 10 ng/g-Control  | 0.5870195 | 0.103146   | 1.0708929 | 0.0099611 |

\$Sex

|     | diff      | lwr       | upr       | p adj    |
|-----|-----------|-----------|-----------|----------|
| M-F | 0.5853587 | 0.3190141 | 0.8517034 | 1.75E-05 |

#### **Data S9. Startle Response Assay Statistical Analysis- F2.**

##### Repeat measure ANOVA

Error: Tap

|           | Df | Sum Sq | Mean Sq | F value | Pr(>F) |
|-----------|----|--------|---------|---------|--------|
| Residuals | 4  | 25.07  | 6.268   |         |        |

Error:

Tap:Treatment

|           | Df | Sum Sq | Mean Sq | F value | Pr(>F)       |
|-----------|----|--------|---------|---------|--------------|
| Treatment | 3  | 190.17 | 63.39   | 55.18   | 2.71E-07 *** |
| Residuals | 12 | 13.78  | 1.15    |         |              |

---

Signif. Codes: 0 '\*\*\*' 0.001 '\*\*' 0.01 '\*' 0.05 '.' 0.1 ' ' 1

Error: Within

|           | Df   | Sum Sq | Mean Sq | F value | Pr(>F)       |
|-----------|------|--------|---------|---------|--------------|
| Sex       | 1    | 211    | 211.1   | 34.59   | 5.27E-09 *** |
| Residuals | 1204 | 7346   | 6.1     |         |              |

---

Signif. Codes: 0 '\*\*\*' 0.001 '\*\*' 0.01 '\*' 0.05 '.' 0.1 ' ' 1

#### Tukey's multiple comparisons of means

95% family-wise confidence level

Fit: aov(formula = mean.distance ~ Treatment + Tap + Sex, data = (sum))

| \$Treatment      | diff       | lwr        | upr        | p adj     |
|------------------|------------|------------|------------|-----------|
| 100 ng/g-Control | -0.2306936 | -0.7432802 | 0.28189295 | 0.6536217 |
| 1 ng/g-Control   | -0.5967469 | -1.1053793 | -0.0881146 | 0.0138094 |
| 10 ng/g-Control  | -1.0551503 | -1.5741064 | -0.5361942 | 0.0000012 |

  

| \$Sex | diff      | lwr       | upr      | p adj |
|-------|-----------|-----------|----------|-------|
| M-F   | 0.8301344 | 0.5543181 | 1.105951 | 0     |

## References

1. Rericha, Y.; Cao, D.; Truong, L.; Simonich, M.; Field, J.A.; Tanguay, R.L. Behavior effects of structurally diverse per- and polyfluoroalkyl substances in zebrafish. *Chem. Res. Toxicol.* **2021**, *34*, 1409–1416.
2. Vial J.; Jardy A. "Experimental Comparison of the Different Approaches To Estimate LOD and LOQ of an HPLC Method," *Analytical Chemistry*, **1999**. *71*, 2672–2677.
